# Supplementary material
Source: PubMed Central journal article supplement (PMC3807489)
Supplement: JB.00504-13_zjb999092863so1.pdf [file JB.00504-13_zjb999092863so1.pdf]

**Supplemental Table S1:** Detailed description of all transposon mutant strains (provided by A. Deutschbauer) used in this study

| Strain ID <sup>a</sup> | Insertion location <sup>b</sup> | Strand <sup>c</sup> | VIMSS ID <sup>d</sup> | Offset <sup>e</sup> | Gene Strand <sup>f</sup> | Gene ID  | Description (as annotated in MicrobesOnline)             |
|------------------------|---------------------------------|---------------------|-----------------------|---------------------|--------------------------|----------|----------------------------------------------------------|
| JK00829                | 1099300                         | +                   | 395608                | 173                 | +                        | Dde_1072 | Conserved hypothetical protein                           |
| JK01112                | 1143756                         | +                   | 395573                | 559                 | +                        | Dde_1114 | Conserved hypothetical protein                           |
| JK01149                | 668339                          | -                   | 392830                | 440                 | -                        | Dde_0649 | HmcE                                                     |
| JK01185                | 697816                          | -                   | 395941                | 188                 | -                        | Dde_0681 | Oxidoreductase, iron-sulfur cluster-binding subunit      |
| JK01905                | 1100971                         | -                   | 395606                | 1461                | -                        | Dde_1074 | L-lactate permease, putative                             |
| JK01925                | 1290825                         | -                   | 395452                | 1357                | -                        | Dde_1273 | Glycine radical family, pyruvate:formate lyase           |
| JK02210                | 699995                          | +                   | 395940                | 201                 | -                        | Dde_0682 | Putative oxidoreductase, major subunit                   |
| JK03586                | 302156                          | +                   | 393120                | 1320                | +                        | Dde_0312 | Oxidoreductase, putative                                 |
| JK03700                | 737451                          | +                   | 395910                | 485                 | +                        | Dde_0718 | Anaerobic dimethyl sulfoxide reductase chain b           |
| JK05672                | 735457                          | +                   | 3334077               | 1524                | +                        | Dde_0717 | Formate dehydrogenase, alpha subunit                     |
| JK05969                | 368539                          | +                   | 393064                | 1070                | -                        | Dde_0374 | NADH oxidase (nox)                                       |
| JK07175                | 3231075                         | -                   | 393794                | 83                  | +                        | Dde_3238 | L-lactate permease, putative                             |
| JK07910                | 3474289                         | -                   | 3334782               | 1811                | +                        | Dde_3513 | Formate dehydrogenase alpha subunit                      |
| JK08116                | 3235202                         | +                   | 393792                | 943                 | +                        | Dde_3240 | Glycolate oxidase iron-sulfur subunit ( <i>E. coli</i> ) |
| JK09366                | 3241265                         | +                   | 393787                | 401                 | +                        | Dde_3245 | Iron-sulfur cluster binding protein                      |
| JK10137                | 2917064                         | +                   | 394059                | 971                 | +                        | Dde_2935 | Probable Ni/Fe-hydrogenase 2 b-type cytochrome subunit   |
| JK10695                | 667540                          | -                   | 392831                | 533                 | -                        | Dde_0648 | HmcF                                                     |
| JK11220                | 482572                          | +                   | 3334012               | 305                 | +                        | Dde_0473 | Formate dehydrogenase, alpha subunit                     |
| JK11401                | 3016773                         | +                   | 393974                | 339                 | +                        | Dde_3029 | CODH nickel-insertion accessory protein (cooC)           |
| JK11903                | 2183143                         | -                   | 394696                | 966                 | +                        | Dde_2135 | Periplasmic [NiFeSe] hydrogenase, large subunit          |
| JK12024                | 2185939                         | +                   | 394693                | 246                 | +                        | Dde_2138 | Probable large subunit, hydrogenase-2                    |
| JK12428                | 3475857                         | +                   | 393590                | 114                 | +                        | Dde_3515 | Conserved hypothetical protein                           |
| JK12756                | 670559                          | -                   | 392828                | 702                 | -                        | Dde_0652 | HmcB                                                     |
| JK13582                | 76078                           | +                   | 393312                | 257                 | +                        | Dde_0081 | Periplasmic (fe) hydrogenase large subunit               |
| JK13595                | 2302198                         | -                   | 394565                | 433                 | -                        | Dde_2281 | Iron only hydrogenase large subunit, C-terminal domain   |
| JK14050                | 834892                          | +                   | 395830                | 1229                | -                        | Dde_0813 | Formate dehydrogenase, alpha subunit                     |

<sup>a</sup> transposon mutant identifier

<sup>b</sup> transposon insertion location in the G20 main chromosome

<sup>c</sup> transposon insertion orientation, (+) is 5' to 3' while (-) is 3' to 5'

<sup>d</sup> gene identifier used in MicrobesOnline

<sup>e</sup> the location of the transposon insertion from the start of the gene

<sup>f</sup> (+) or (-) define whether the targeted gene is on the plus or minus strand

**Supplemental Figure S2:** Scanning electron microscopy (SEM) images of *D. alaskensis* str. G20 grown at low growth rate of  $0.027 \text{ h}^{-1}$  in coculture with (A) *M. maripaludis* or (B) *M. hungatei*.

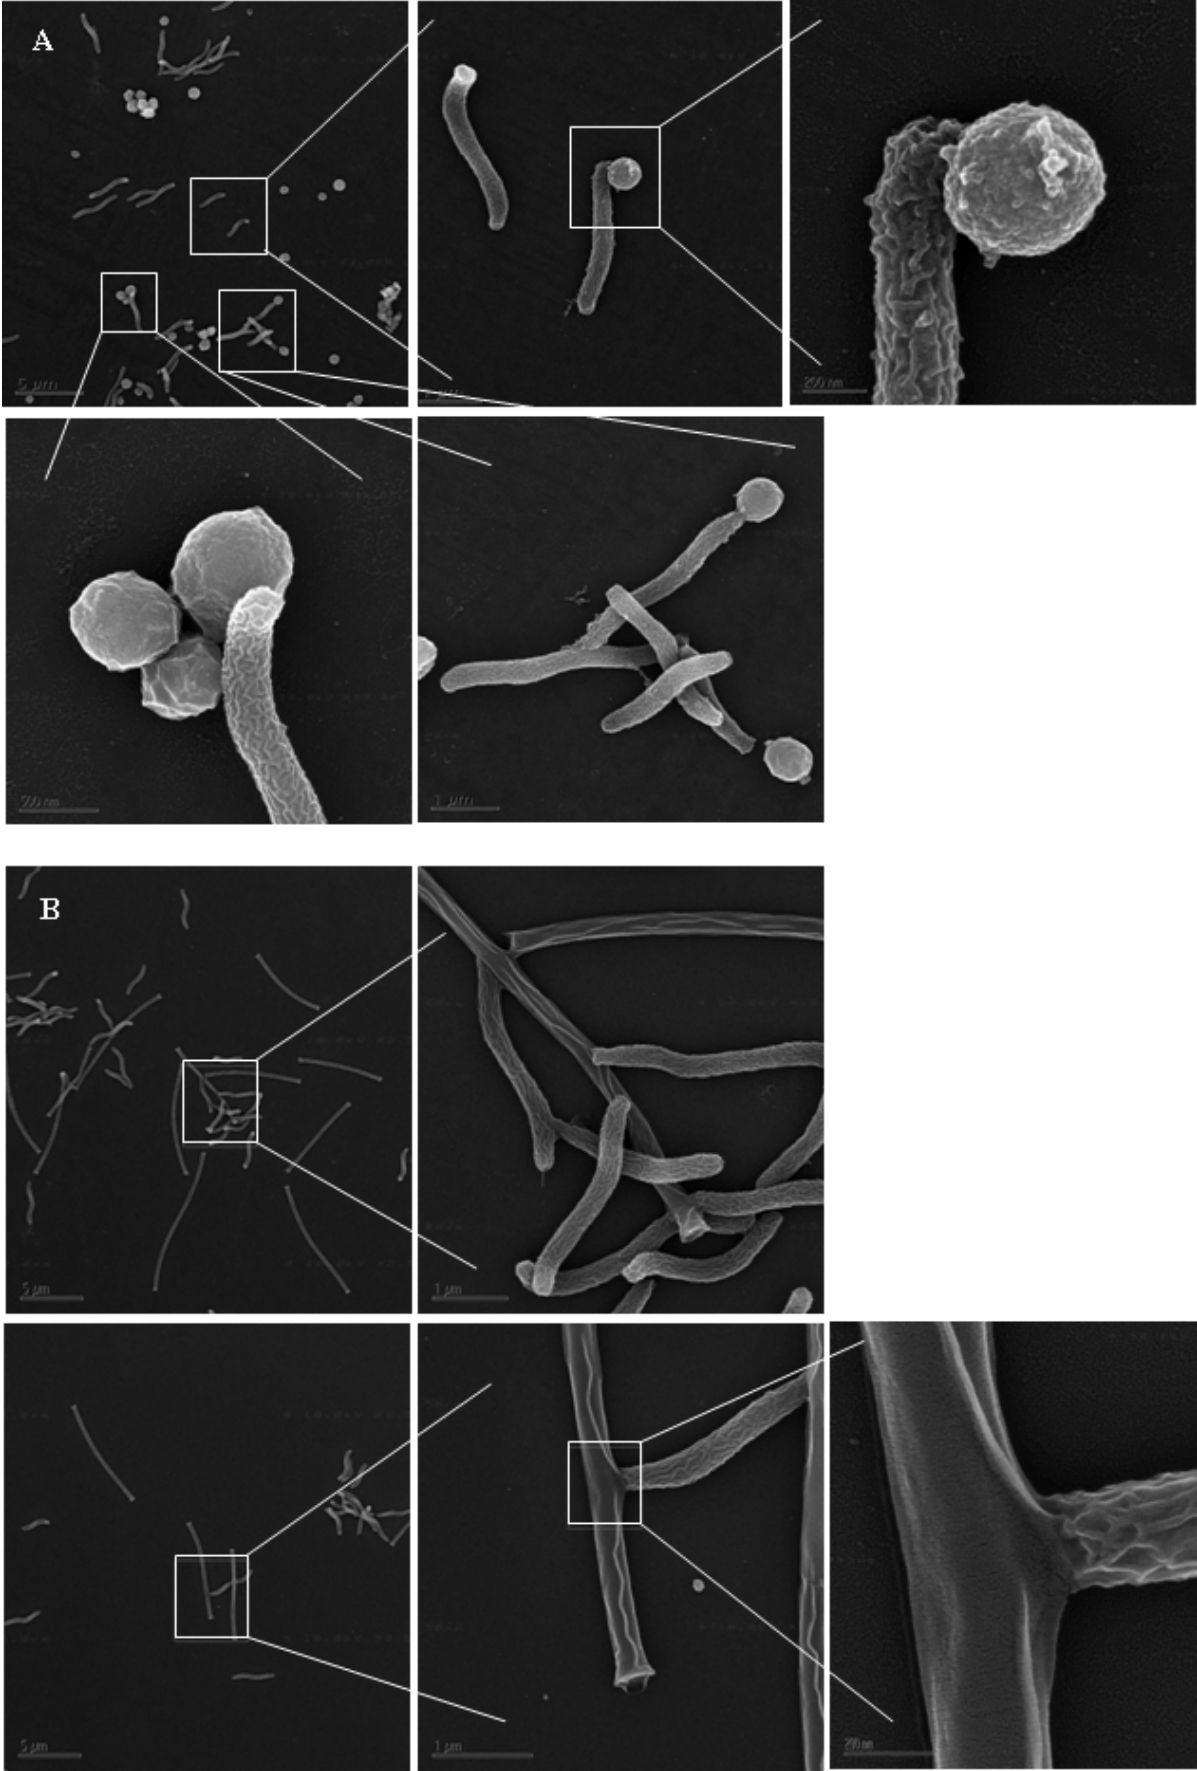

Cell collection and fixation for SEM imaging: 1 ml cell suspension (anoxic) added to 5 ml fixative mix (2.5 % glutaraldehyde in 0.1% sodium cacodylate buffer) in 15 ml Falcon tube, gently mixed (3-4 times carefully flipping the tube), and stored at 4°C in the dark until further analysis.

Scanning electron microscopy (SEM) imaging: SEM sample preparation and imaging was carried out by M. Zemla at LBNL, Berkeley (M. Auer laboratory, LBNL, Berkeley; all images courteously provided by M. Auer). SEM samples of the fixed cells were prepared using poly-l-lysine coated silicon wafers followed by a post-fixation with 1% osmium tetroxide, dehydration with a graded ethanol series (20%, 40%, 60%, 80%, 100%, 100%, 100%), critical point drying using a Tousimis Auto Samdri 815 Critical Point Dryer (Tousimis, Rockville, MD, USA), and sputter coating with 10-15 nm gold-palladium using a Tousimis Sputter Coater (Tousimis, Rockville, MD, USA). Images were collected using a Hitachi S5000 Scanning Electron Microscope (Hitachi High Technologies America, Pleasanton, CA, USA). Image annotation and linear contrast optimization was performed in Adobe Illustrator CS2.

**Supplemental Table S3A:** Differentially expressed genes organized by their COG functional categories in *Dv. alaskensis* str. G20 grown under syntrophic conditions with *Methanococcus maripaludis* at 0.027 h<sup>-1</sup>

**E. Amino acid transport and metabolism**

| Gene ID  | Gene name | Log <sub>2</sub> R | Z-score | Annotation                                                                    |
|----------|-----------|--------------------|---------|-------------------------------------------------------------------------------|
| Dde_0090 |           | 1,34               | 5,61    | 2-hydroxyglutaryl-CoA dehydratase family (Natalia Ivanova)                    |
| Dde_1326 |           | 0,49               | 4,94    | ABC-type dipeptide/oligopeptide/nickel transport system, ATPase component     |
| Dde_1328 |           | 0,53               | 4,66    | ABC-type dipeptide/oligopeptide/nickel transport systems, permease components |
| Dde_1329 |           | 0,52               | 4,13    | ABC-type dipeptide transport system, periplasmic component                    |
| Dde_1692 | gcvP      | -0,52              | -5,61   | Glycine cleavage system P protein, subunit 1 (gcvP)                           |
| Dde_2166 | ilvC      | -0,64              | -3,91   | Ketol-acid reductoisomerase / Dehydropantoate reductase (Natalia Ivanova)     |
| Dde_2306 |           | -0,55              | -4,02   | Arginine ABC transporter, periplasmic arginine-binding protein, putative      |

**G. Carbohydrate transport and metabolism**

| Gene ID  | Gene name | Log <sub>2</sub> R | Z-score | Annotation                                       |
|----------|-----------|--------------------|---------|--------------------------------------------------|
| Dde_0828 |           | -0,50              | -5,57   | TPR domain protein                               |
| Dde_1091 |           | 0,91               | 2,29    | Conserved hypothetical protein                   |
| Dde_3736 | gap       | -0,55              | -5,27   | Glyceraldehyde-3-phosphate dehydrogenase, type I |

**D. Cell division and chromosome partitioning**

| Gene ID  | Gene name | Log <sub>2</sub> R | Z-score | Annotation                                    |
|----------|-----------|--------------------|---------|-----------------------------------------------|
| Dde_0832 |           | -0,51              | -5,59   | Polysaccharide biosynthesis protein, putative |
| Dde_3202 | mrp       | -1,71              | -5,61   | Mrp protein (mrp)                             |

**N. Cell motility and secretion**

| Gene ID  | Gene name | Log <sub>2</sub> R | Z-score | Annotation                       |
|----------|-----------|--------------------|---------|----------------------------------|
| Dde_3159 | flgF      | 0,61               | 5,44    | Flagellar basal body rod protein |

**M. Cell envelope biogenesis**

| Gene ID  | Gene name | Log <sub>2</sub> R | Z-score | Annotation                                     |
|----------|-----------|--------------------|---------|------------------------------------------------|
| Dde_0456 |           | -0,68              | -5,61   | TonB-like                                      |
| Dde_0829 | pss       | -0,59              | -5,61   | Exopolysaccharide production protein Pss (pss) |
| Dde_0830 |           | -0,66              | -5,61   | Outer membrane protein, putative               |
| Dde_2156 |           | -1,60              | -5,61   | TonB-like                                      |

**H. Coenzyme metabolism**

| Gene ID  | Gene name | Log <sub>2</sub> R | Z-score | Annotation                            |
|----------|-----------|--------------------|---------|---------------------------------------|
| Dde_0719 |           | 1,17               | 5,55    | Fe-S cluster domain protein           |
| Dde_1556 | thiH      | -0,52              | -3,78   | Thiamin biosynthesis, thiazole moiety |

**V. Defense mechanisms**

| Gene ID  | Gene name | Log <sub>2</sub> R | Z-score | Annotation                                            |
|----------|-----------|--------------------|---------|-------------------------------------------------------|
| Dde_0445 |           | -1,40              | -5,61   | ABC-type multidrug transport system, ATPase component |

**C. Energy production and conversion**

| Gene ID  | Gene name | Log <sub>2</sub> R | Z-score | Annotation                                                          |
|----------|-----------|--------------------|---------|---------------------------------------------------------------------|
| Dde_0082 | hydB      | 0,57               | 5,53    | Periplasmic (fe) hydrogenase small subunit precursor                |
| Dde_0286 | fd II     | 1,31               | 5,61    | Ferredoxin II (Sean Caffrey)                                        |
| Dde_0715 |           | 2,85               | 5,61    | hypothetical protein                                                |
| Dde_0717 |           | 1,40               | 5,61    | formate dehydrogenase, alpha subunit                                |
| Dde_0718 |           | 1,10               | 5,61    | Anaerobic dimethyl sulfoxide reductase chain b (hybA)               |
| Dde_1074 |           | 1,30               | 5,61    | Putative permease                                                   |
| Dde_1112 | QmoB      | -0,50              | -4,29   | Quinone-interacting membrane-bound oxidoreductase (Shelley Haveman) |
| Dde_2134 |           | -1,33              | -5,61   | hydrogenase (NiFe) small subunit HydA                               |

|          |        |       |       |                                                                            |
|----------|--------|-------|-------|----------------------------------------------------------------------------|
| Dde_2135 | hysA   | -1,37 | -5,61 | periplasmic [NiFeSe] hydrogenase, large subunit, selenocysteine-containing |
| Dde_2137 | hynB-1 | 1,11  | 5,61  | periplasmic [NiFe] hydrogenase, small subunit, isozyme 1 (Sean Caffrey)    |
| Dde_2138 | hynA-1 | 0,94  | 4,23  | Probable large subunit, hydrogenase-2                                      |
| Dde_2274 | dsrO   | -0,63 | -4,51 | Periplasmic (Tat), binds 2[4Fe-4S] (Shelley Haveman)                       |
| Dde_2280 | hydB-2 | 0,50  | 5,30  | Periplasmic Fe hydrogenase small subunit (Shelley Haveman)                 |
| Dde_2562 |        | -0,69 | -4,65 | Pyridine nucleotide-disulphide oxidoreductase family                       |
| Dde_2641 | b0873  | -0,76 | -3,32 | hybrid cluster protein                                                     |
| Dde_2701 | qtpE   | -0,57 | -2,54 | ATP synthase c chain                                                       |
| Dde_2749 |        | -0,65 | -3,95 | rubredoxin                                                                 |
| Dde_3182 |        | 1,22  | 4,11  | Cytochrome c3 precursor                                                    |
| Dde_3200 |        | -1,67 | -5,61 | Iron-sulfur cluster binding protein                                        |
| Dde_3211 |        | 1,50  | 4,22  | split solet cytochrome c precursor                                         |
| Dde_3201 |        | -1,12 | -5,61 | Iron-sulfur cluster binding protein                                        |
| Dde_3237 |        | 0,62  | 5,43  | Putative oxidoreductase, Fe-S subunit                                      |
| Dde_3238 |        | 0,62  | 4,36  | L-lactate permease, putative                                               |
| Dde_3239 | glcD   | 0,75  | 2,57  | Glycolate oxidase subunit D                                                |
| Dde_3240 |        | 0,63  | 3,72  | Glycolate oxidase iron-sulfur subunit. {escherichia, putative              |
| Dde_3242 | ackA   | 0,56  | 5,45  | acetate kinase                                                             |
| Dde_3245 |        | 0,62  | 3,76  | Iron-sulfur cluster binding protein                                        |
| Dde_3667 | fld    | -2,68 | -5,61 | Flavodoxin, iron-repressed (Dmitry Rodionov)                               |
| Dde_3707 | tmcD   | -1,49 | -5,61 | Transmembrane complex                                                      |
| Dde_3708 | tmcC   | -1,00 | -5,61 | Transmembrane complex, integral membrane protein (Shelley Haveman)         |
| Dde_3709 | tmcB   | -1,51 | -5,61 | Transmembrane complex, ferredoxin, 2 [4Fe-4S] (Shelley Haveman)            |
| Dde_3710 | tmcA   | -1,02 | -5,61 | Transmembrane complex, tetraheme cytochrome c3 (Shelley Haveman)           |

## S. Function unknown

| Gene ID  | Gene name | Log <sub>2</sub> R | Z-score | Annotation                                      |
|----------|-----------|--------------------|---------|-------------------------------------------------|
| Dde_0484 |           | -0,89              | -5,61   | Conserved hypothetical protein                  |
| Dde_0959 |           | 0,61               | 4,46    | Uncharacterized conserved protein               |
| Dde_2018 |           | 1,99               | 5,61    | HesB-like domain, putative                      |
| Dde_2020 |           | -1,57              | -5,61   | Conserved hypothetical protein                  |
| Dde_2561 |           | -0,74              | -5,03   | Rhodanese-like domain protein                   |
| Dde_2799 |           | 0,54               | 3,32    | Uncharacterized phage-encoded protein           |
| Dde_3198 |           | -1,94              | -5,61   | Uncharacterized ACR, COG1433 family             |
| Dde_3244 |           | 0,51               | 4,88    | Uncharacterized ACR, YkgG family COG1556 family |

## R. General function prediction only

| Gene ID  | Gene name | Log <sub>2</sub> R | Z-score | Annotation                                                           |
|----------|-----------|--------------------|---------|----------------------------------------------------------------------|
| Dde_0444 | pqqL      | -1,53              | -5,61   | Putative peptidase                                                   |
| Dde_0449 |           | -0,69              | -4,92   | Putative transport system permease protein                           |
| Dde_1883 |           | 0,64               | 3,11    | Phage protein D                                                      |
| Dde_2281 | hydA-2    | 0,76               | 5,04    | Iron only hydrogenase large subunit, C-terminal domain               |
| Dde_2922 | norQ      | 0,56               | 3,55    | NorQ protein (norQ)                                                  |
| Dde_3033 |           | 0,49               | 2,46    | Metal-dependent amidase/aminoacylase/carboxypeptidase                |
| Dde_3243 |           | 0,57               | 5,61    | Phosphate acetyltransferase, putative                                |
| Dde_3351 |           | 0,50               | 4,98    | B protein, putative                                                  |
| Dde_3372 |           | 0,57               | 5,11    | Conserved hypothetical protein                                       |
| Dde_3640 |           | -0,54              | -4,49   | Carbonic anhydrases/acetyltransferases, isoleucine patch superfamily |
| Dde_0444 | pqqL      | -1,53              | -5,61   | Putative peptidase                                                   |

## P. Inorganic ion transport and metabolism

| Gene ID  | Gene name | Log <sub>2</sub> R | Z-score | Annotation                                                          |
|----------|-----------|--------------------|---------|---------------------------------------------------------------------|
| Dde_0326 |           | -0,67              | -5,54   | Putative a membrane protein                                         |
| Dde_0805 |           | 1,07               | 5,61    | DoxX family protein                                                 |
| Dde_0806 |           | 1,14               | 5,61    | Rhodanese-like domain protein                                       |
| Dde_1312 |           | -1,76              | -5,61   | Copper chaperone                                                    |
| Dde_2506 |           | 0,67               | 2,07    | Orf, hypothetical protein                                           |
| Dde_2669 | feoB      | -2,06              | -5,61   | ferrous iron transport protein B                                    |
| Dde_2670 | feoA      | -2,50              | -5,61   | ferrous iron transporter component feoA (Dmitry Rodionov)           |
| Dde_2673 | feoA      | -1,98              | -5,61   | ferrous iron transporter component feoA (Dmitry Rodionov)           |
| Dde_3324 | phnC      | 0,55               | 4,86    | ATP-binding component of phosphonate transport                      |
| Dde_3326 | phnE      | 0,61               | 4,94    | ABC-type phosphate/phosphonate transport system, permease component |

## U. Intracellular trafficking, secretion, and vesicular transport

| Gene ID  | Gene name | Log <sub>2</sub> R | Z-score | Annotation                         |
|----------|-----------|--------------------|---------|------------------------------------|
| Dde_0453 |           | -0,65              | -5,61   | biopolymer transport proteins-like |
| Dde_0454 |           | -0,54              | -5,61   | biopolymer transport proteins-like |

|          |      |       |       |                                          |
|----------|------|-------|-------|------------------------------------------|
| Dde_0455 |      | -0,51 | -4,64 | Biopolymer transport protein             |
| Dde_2153 |      | -2,64 | -5,61 | Biopolymer transport proteins            |
| Dde_2154 |      | -2,78 | -5,61 | Biopolymer transport proteins            |
| Dde_2155 |      | -1,90 | -5,61 | Biopolymer transport protein             |
| Dde_2177 | tatA | 0,90  | 3,55  | Twin-arginine translocation protein TatA |
| Dde_2237 | secY | -0,59 | -5,33 | Putative ATPase subunit of translocase   |

## I. Lipid transport and metabolism

| Gene ID  | Gene name | Log <sub>2</sub> R | Z-score | Annotation                                                                 |
|----------|-----------|--------------------|---------|----------------------------------------------------------------------------|
| Dde_0089 |           | 1,17               | 5,61    | Activator of 2-hydroxyglutaryl-CoA dehydratase (HSP70-class ATPase domain) |

## O. Posttranslational modification, protein turnover, chaperones

| Gene ID  | Gene name | Log <sub>2</sub> R | Z-score | Annotation                                                           |
|----------|-----------|--------------------|---------|----------------------------------------------------------------------|
| Dde_1343 | hspC      | -0,50              | -5,61   | Small heat shock protein (class I) (hspC)                            |
| Dde_2473 | mopA      | -0,51              | -5,61   | GroEL, chaperone Hsp60, peptide-dependent ATPase, heat shock protein |
| Dde_2560 |           | -0,90              | -4,19   | Thioredoxin peroxidase                                               |
| Dde_3054 | pflA      | 0,65               | 3,48    | Pyruvate formate-lyase activating enzyme (pflA)                      |

## L. Replication, recombination and repair

| Gene ID  | Gene name | Log <sub>2</sub> R | Z-score | Annotation                          |
|----------|-----------|--------------------|---------|-------------------------------------|
| Dde_0912 |           | 0,50               | 4,34    | Site-specific recombinase XerD      |
| Dde_1172 | hrpB      | 0,74               | 2,07    | ATP-dependent helicase HrpB         |
| Dde_1921 |           | 0,49               | 4,76    | DNA primase (bacterial type)        |
| Dde_2323 | ruvA      | 0,49               | 1,97    | Holliday junction DNA helicase RuvA |

## T. Signal transduction mechanisms

| Gene ID  | Gene name | Log <sub>2</sub> R | Z-score | Annotation                                                                                 |
|----------|-----------|--------------------|---------|--------------------------------------------------------------------------------------------|
| Dde_0227 | cstA      | 0,75               | 3,19    | Carbon starvation protein                                                                  |
| Dde_0327 |           | -0,55              | -5,34   | Response regulator containing CheY-like receiver, AAA-type ATPase, and DNA-binding domains |
| Dde_0533 |           | 0,57               | 3,02    | FOG: CheY-like receiver                                                                    |
| Dde_1151 | hdd       | -0,60              | -3,91   | Response regulator containing a CheY-like receiver domain and an HD-GYP domain             |
| Dde_2172 |           | -0,60              | -5,35   | YGGT family superfamily                                                                    |
| Dde_3047 |           | -0,61              | -3,20   | Serine phosphatase RsbU, regulator of sigma subunit                                        |
| Dde_3048 | gdp       | -0,75              | -4,63   | FOG: GGDEF domain                                                                          |
| Dde_3712 |           | -1,53              | -5,61   | Universal stress protein family family                                                     |
| Dde_3713 | mtrA      | -1,60              | -5,61   | DNA-binding response regulator (mtrA)                                                      |
| Dde_3715 |           | -0,59              | -3,07   | Sensory transduction histidine kinase-related                                              |
| Dde_3737 |           | -0,70              | -5,61   | Phosphoenolpyruvate-protein phosphotransferase, putative                                   |

## K. Transcription

| Gene ID  | Gene name | Log <sub>2</sub> R | Z-score | Annotation                                                                          |
|----------|-----------|--------------------|---------|-------------------------------------------------------------------------------------|
| Dde_0710 |           | 0,56               | 2,40    | Phosphoglycerate transport system transcriptional regulatory protein PgtA, putative |
| Dde_1611 |           | -1,21              | -5,61   | AraC family transcriptional regulator                                               |
| Dde_1741 |           | 0,67               | 2,71    | Prophage antirepressor                                                              |

## J. Translation, ribosomal structure, and biogenesis

| Gene ID  | Gene name | Log <sub>2</sub> R | Z-score | Annotation                        |
|----------|-----------|--------------------|---------|-----------------------------------|
| Dde_0017 |           | 0,55               | 2,11    | sun protein                       |
| Dde_2236 | map       | -0,56              | -5,60   | methionine aminopeptidase, type I |
| Dde_2251 | rpsC      | -0,49              | -3,64   | Ribosomal protein S3              |
| Dde_2255 | rplW      | -0,60              | -5,23   | 50S ribosomal subunit protein L23 |
| Dde_2982 | rpmE      | 0,78               | 5,00    | Ribosomal protein L31             |
| Dde_2989 | tuf       | 0,60               | 4,67    | Translation elongation factor Tuf |
| Dde_0017 |           | 0,55               | 2,11    | sun protein                       |

**Supplemental Table S3B:** Differentially expressed genes organized by their COG functional categories in *Dv. alaskensis* str. G20 grown under syntrophic conditions with *Methanospirillum hungatei* at 0.027 h<sup>-1</sup>

**E. Amino acid transport and metabolism**

| Gene ID  | Gene name | Log <sub>2</sub> R | Z-score | Annotation                                             |
|----------|-----------|--------------------|---------|--------------------------------------------------------|
| Dde_0448 |           | -0,64              | -5,61   | ABC transporter, periplasmic substrate-binding protein |
| Dde_0608 | livF      | 1,00               | 2,54    | ATP-binding component of leucine transport             |
| Dde_2664 | lysA      | 0,52               | 2,87    | diaminopimelate decarboxylase                          |

**D. Cell division and chromosome partitioning**

| Gene ID  | Gene name | Log <sub>2</sub> R | Z-score | Annotation                                       |
|----------|-----------|--------------------|---------|--------------------------------------------------|
| Dde_3029 | cooC-2    | 0,69               | 4,95    | CODH nickel-insertion accessory protein (cooC-2) |
| Dde_3202 | mrp       | -1,74              | -5,61   | Mrp protein (mrp)                                |

**N. Cell motility and secretion**

| Gene ID  | Gene name | Log <sub>2</sub> R | Z-score | Annotation                                                    |
|----------|-----------|--------------------|---------|---------------------------------------------------------------|
| Dde_3158 | flgG      | 0,68               | 5,61    | Flagellar biosynthesis, cell-distal portion of basal-body rod |
| Dde_3159 | flgF      | 0,77               | 5,61    | Flagellar basal-body rod protein FlgF (flgF)                  |

**M. Cell envelope biogenesis**

| Gene ID  | Gene name | Log <sub>2</sub> R | Z-score | Annotation |
|----------|-----------|--------------------|---------|------------|
| Dde_0456 |           | -0,76              | -5,61   | TonB-like  |
| Dde_2156 |           | -1,76              | -5,61   | TonB-like  |

**H. Coenzyme metabolism**

| Gene ID  | Gene name | Log <sub>2</sub> R | Z-score | Annotation                         |
|----------|-----------|--------------------|---------|------------------------------------|
| Dde_0234 |           | 1,18               | 5,38    | Conserved hypothetical protein     |
| Dde_0719 |           | 1,91               | 5,61    | Fe-S cluster domain protein        |
| Dde_0871 |           | -0,59              | -3,71   | Molybdopterin-binding protein      |
| Dde_1554 |           | -0,56              | -4,69   | thiamine biosynthesis protein ThiS |
| Dde_3309 |           | 0,51               | 4,01    | Conserved hypothetical protein     |

**V. Defense mechanisms**

| Gene ID  | Gene name | Log <sub>2</sub> R | Z-score | Annotation                                            |
|----------|-----------|--------------------|---------|-------------------------------------------------------|
| Dde_0445 |           | -1,53              | -5,61   | ABC-type multidrug transport system, ATPase component |

**C. Energy production and conversion**

| Gene ID  | Gene name | Log <sub>2</sub> R | Z-score | Annotation                                                            |
|----------|-----------|--------------------|---------|-----------------------------------------------------------------------|
| Dde_0715 |           | 3,60               | 5,61    | hypothetical protein                                                  |
| Dde_0717 |           | 2,90               | 5,61    | formate dehydrogenase, alpha subunit                                  |
| Dde_0718 |           | 2,20               | 5,61    | Anaerobic dimethyl sulfoxide reductase chain b (hyaA)                 |
| Dde_1074 |           | 1,50               | 5,61    | Putative permease                                                     |
| Dde_2562 |           | -0,75              | -5,61   | Pyridine nucleotide-disulphide oxidoreductase family                  |
| Dde_2641 | b0873     | -0,93              | -4,48   | hybrid cluster protein                                                |
| Dde_2749 |           | -0,57              | -4,11   | rubredoxin                                                            |
| Dde_2933 |           | 0,64               | 5,61    | Molybdopterin oxidoreductase, molybdopterin binding subunit, putative |
| Dde_2934 | narH      | 0,60               | 5,47    | Respiratory nitrate reductase, beta subunit (narH)                    |
| Dde_3028 | cooS      | 0,79               | 5,05    | carbon-monoxide dehydrogenase, catalytic subunit                      |
| Dde_3182 |           | 1,19               | 4,20    | Cytochrome c3 precursor                                               |
| Dde_3195 | fprA-2    | 0,63               | 5,61    | Putative flavodoxin                                                   |
| Dde_3200 |           | -1,67              | -5,61   | Iron-sulfur cluster binding protein                                   |
| Dde_3201 |           | -1,05              | -5,61   | Iron-sulfur cluster binding protein                                   |
| Dde_3211 |           | 1,88               | 4,82    | split soret cytochrome c precursor                                    |
| Dde_3237 |           | 0,80               | 5,61    | Putative oxidoreductase, Fe-S subunit                                 |
| Dde_3238 |           | 0,68               | 5,61    | L-lactate permease, putative                                          |
| Dde_3239 | glcD      | 1,01               | 5,15    | Glycolate oxidase subunit D                                           |

|          |      |       |       |                                                                    |
|----------|------|-------|-------|--------------------------------------------------------------------|
| Dde_3240 |      | 0,91  | 5,61  | Glycolate oxidase iron-sulfur subunit, putative                    |
| Dde_3242 | ackA | 0,93  | 5,61  | acetate kinase                                                     |
| Dde_3245 |      | 0,96  | 5,32  | Iron-sulfur cluster binding protein                                |
| Dde_3667 | fld  | -2,83 | -5,61 | Flavodoxin, iron-repressed (Dmitry Rodionov)                       |
| Dde_3707 | tmcD | -1,60 | -5,61 | Transmembrane complex                                              |
| Dde_3708 | tmcC | -1,18 | -5,61 | Transmembrane complex, integral membrane protein (Shelley Haveman) |
| Dde_3709 | tmcB | -1,62 | -5,61 | Transmembrane complex, ferredoxin, 2 [4Fe-4S] (Shelley Haveman)    |
| Dde_3710 | tmcA | -1,13 | -5,61 | Transmembrane complex, tetraheme cytochrome c3 (Shelley Haveman)   |

## S. Function unknown

| Gene ID  | Gene name | Log <sub>2</sub> R | Z-score | Annotation                                      |
|----------|-----------|--------------------|---------|-------------------------------------------------|
| Dde_0484 |           | -1,02              | -5,61   | Conserved hypothetical protein                  |
| Dde_0876 |           | 0,79               | 5,10    | Uncharacterised protein family UPF0324          |
| Dde_2561 |           | -0,71              | -5,61   | Rhodanese-like domain protein                   |
| Dde_3198 |           | -1,88              | -5,61   | Uncharacterized ACR, COG1433 family             |
| Dde_3244 |           | 0,73               | 5,61    | Uncharacterized ACR, YkgG family COG1556 family |

## R. General function prediction only

| Gene ID  | Gene name | Log <sub>2</sub> R | Z-score | Annotation                                    |
|----------|-----------|--------------------|---------|-----------------------------------------------|
| Dde_0220 |           | -0,50              | -4,12   | Sel1 domain protein repeat-containing protein |
| Dde_0444 | pqqL      | -1,73              | -5,61   | Putative peptidase                            |
| Dde_0449 |           | -0,73              | -5,61   | Putative transport system permease protein    |
| Dde_0450 | oppC      | -0,66              | -5,61   | Putative transport system permease protein    |
| Dde_3241 | pta       | 0,66               | 5,38    | Phosphotransacetylase                         |
| Dde_3243 |           | 0,88               | 5,61    | Phosphate acetyltransferase, putative         |
| Dde_3372 |           | 0,50               | 4,55    | Conserved hypothetical protein                |

## P. Inorganic ion transport and metabolism

| Gene ID  | Gene name | Log <sub>2</sub> R | Z-score | Annotation                                                |
|----------|-----------|--------------------|---------|-----------------------------------------------------------|
| Dde_1312 |           | -1,76              | -5,61   | Copper chaperone                                          |
| Dde_2669 | feoB      | -2,17              | -5,61   | ferrous iron transport protein B                          |
| Dde_2670 | feoA      | -2,45              | -5,61   | ferrous iron transporter component feoA (Dmitry Rodionov) |
| Dde_2673 | feoA      | -1,80              | -5,61   | ferrous iron transporter component feoA (Dmitry Rodionov) |

## U. Intracellular trafficking, secretion, and vesicular transport

| Gene ID  | Gene name | Log <sub>2</sub> R | Z-score | Annotation                         |
|----------|-----------|--------------------|---------|------------------------------------|
| Dde_0453 |           | -0,81              | -5,61   | biopolymer transport proteins-like |
| Dde_0454 |           | -0,73              | -5,61   | biopolymer transport proteins-like |
| Dde_0455 |           | -0,67              | -5,61   | Biopolymer transport protein       |
| Dde_2153 |           | -2,74              | -5,61   | Biopolymer transport proteins      |
| Dde_2154 |           | -3,06              | -5,61   | Biopolymer transport proteins      |
| Dde_2155 |           | -2,08              | -5,61   | Biopolymer transport protein       |

## I. Lipid transport and metabolism

| Gene ID  | Gene name | Log <sub>2</sub> R | Z-score | Annotation                                          |
|----------|-----------|--------------------|---------|-----------------------------------------------------|
| Dde_3217 | pssA      | 0,77               | 4,21    | CDP-diacylglycerol-serine O-phosphatidyltransferase |

## O. Posttranslational modification, protein turnover, chaperones

| Gene ID  | Gene name | Log <sub>2</sub> R | Z-score | Annotation                                     |
|----------|-----------|--------------------|---------|------------------------------------------------|
| Dde_1203 |           | 0,62               | 2,37    | thioredoxin reductase                          |
| Dde_1343 | hspC      | -0,59              | -5,61   | Small heat shock protein (class I) (hspC)      |
| Dde_1344 |           | -0,55              | -5,61   | Putative small heat shock protein hsp15        |
| Dde_2560 |           | -0,90              | -3,90   | Thioredoxin peroxidase                         |
| Dde_2946 | hflK      | 0,57               | 4,43    | HflK protein                                   |
| Dde_3412 |           | -0,53              | -2,45   | Molecular chaperone (small heat shock protein) |

## T. Signal transduction mechanisms

| Gene ID | Gene name | Log <sub>2</sub> R | Z-score | Annotation |
|---------|-----------|--------------------|---------|------------|
|---------|-----------|--------------------|---------|------------|



|          |          |       |       |                                                                                |
|----------|----------|-------|-------|--------------------------------------------------------------------------------|
| Dde_0227 | cstA     | 1,49  | 4,98  | Carbon starvation protein                                                      |
| Dde_1151 | hdd      | -0,69 | -3,92 | Response regulator containing a CheY-like receiver domain and an HD-GYP domain |
| Dde_3047 | Dde_3047 | -0,80 | -5,43 | Serine phosphatase RsbU, regulator of sigma subunit                            |
| Dde_3048 | gdp      | -0,90 | -4,84 | FOG: GGDEF domain                                                              |
| Dde_3712 | Dde_3712 | -1,81 | -5,61 | Universal stress protein family family                                         |
| Dde_3713 | mtrA     | -1,81 | -5,61 | DNA-binding response regulator (mtrA)                                          |
| Dde_3715 | Dde_3715 | -0,70 | -4,46 | Sensory transduction histidine kinase-related                                  |
| Dde_3737 | Dde_3737 | -0,73 | -5,61 | Phosphoenolpyruvate-protein phosphotransferase, putative                       |

## K. Transcription

| Gene ID  | Gene name | Log <sub>2</sub> R | Z-score | Annotation                                           |
|----------|-----------|--------------------|---------|------------------------------------------------------|
| Dde_1611 |           | -1,21              | -4,15   | AraC family transcriptional regulator                |
| Dde_3179 |           | 0,55               | 4,44    | Putative heme biosynthesis protein (Natalia Ivanova) |

## J. Translation, ribosomal structure, and biogenesis

| Gene ID  | Gene name | Log <sub>2</sub> R | Z-score | Annotation                       |
|----------|-----------|--------------------|---------|----------------------------------|
| Dde_2982 | rpmE      | 1,19               | 5,61    | Ribosomal protein L31            |
| Dde_2989 | tuf       | 0,77               | 5,61    | Translation elongation factor Tu |

**Supplemental Table S4A: TOP 50 up- or downregulated genes in *Dv. alaskensis* str. G20 grown under syntrophic conditions with *Methanococcus maripaludis* at 0.027 h<sup>-1</sup> growth rate**

**Upregulated**

| Gene ID  | Gene name | Log <sub>2</sub> R | Z-score | Annotation                                                                          |
|----------|-----------|--------------------|---------|-------------------------------------------------------------------------------------|
| Dde_0715 |           | 2,85               | 5,61    | hypothetical protein                                                                |
| Dde_2018 |           | 1,99               | 5,61    | HesB-like domain, putative                                                          |
| Dde_3211 |           | 1,50               | 4,22    | split soret cytochrome c precursor                                                  |
| Dde_0717 |           | 1,40               | 5,61    | formate dehydrogenase, alpha subunit                                                |
| Dde_0090 |           | 1,34               | 5,61    | 2-hydroxyglutaryl-CoA dehydratase family (Natalia Ivanova)                          |
| Dde_0286 | fd II     | 1,31               | 5,61    | Ferredoxin II (Sean Caffrey)                                                        |
| Dde_1074 |           | 1,30               | 5,61    | Putative permease                                                                   |
| Dde_3182 |           | 1,22               | 4,11    | Cytochrome c3 precursor                                                             |
| Dde_0089 |           | 1,17               | 5,61    | Putative enzyme                                                                     |
| Dde_0719 |           | 1,17               | 5,55    | Fe-S cluster domain protein                                                         |
| Dde_0806 |           | 1,14               | 5,61    | Rhodanese-like domain protein                                                       |
| Dde_1906 |           | 1,13               | 2,22    | hypothetical protein                                                                |
| Dde_2137 | hynB-1    | 1,11               | 5,61    | periplasmic [NiFe] hydrogenase, small subunit, isozyme 1 (Sean Caffrey)             |
| Dde_0718 |           | 1,10               | 5,61    | Anaerobic dimethyl sulfoxide reductase chain b (hybA)                               |
| Dde_0805 |           | 1,07               | 5,61    | DoxX family protein                                                                 |
| Dde_1866 |           | 1,00               | 3,19    | hypothetical protein                                                                |
| Dde_2138 | hynA-1    | 0,94               | 4,23    | Probable large subunit, hydrogenase-2                                               |
| Dde_1091 |           | 0,91               | 2,29    | Conserved hypothetical protein                                                      |
| Dde_2177 | TatA      | 0,90               | 3,55    | twin-arginine translocation protein TatA (Kennan Kellaris Salinero)                 |
| Dde_2982 | rpmE      | 0,78               | 5,00    | Ribosomal protein L31                                                               |
| Dde_2281 | hydA-2    | 0,76               | 5,04    | Iron only hydrogenase large subunit, C-terminal domain                              |
| Dde_0227 | cstA      | 0,75               | 3,19    | Carbon starvation protein                                                           |
| Dde_3239 | glcD      | 0,75               | 2,57    | Glycolate oxidase subunit D                                                         |
| Dde_1172 | hrpB      | 0,74               | 2,07    | ATP-dependent helicase HrpB                                                         |
| Dde_1741 |           | 0,67               | 2,71    | Prophage antirepressor                                                              |
| Dde_2506 |           | 0,67               | 2,07    | Orf, hypothetical protein                                                           |
| Dde_3054 | pflA      | 0,65               | 3,48    | Pyruvate formate-lyase activating enzyme (pflA)                                     |
| Dde_1883 |           | 0,64               | 3,11    | Phage protein D                                                                     |
| Dde_3240 |           | 0,63               | 3,72    | Glycolate oxidase iron-sulfur subunit, putative                                     |
| Dde_3245 |           | 0,62               | 3,76    | Iron-sulfur cluster binding protein                                                 |
| Dde_3238 |           | 0,62               | 4,36    | L-lactate permease, putative                                                        |
| Dde_3237 |           | 0,62               | 5,43    | Putative oxidoreductase, Fe-S subunit                                               |
| Dde_0959 |           | 0,61               | 4,46    | Uncharacterized conserved protein                                                   |
| Dde_3326 | phnE      | 0,61               | 4,94    | ABC-type phosphate/phosphonate transport system, permease component                 |
| Dde_3159 | flgF      | 0,61               | 5,44    | Flagellar basal-body rod protein FlgF (flgF)                                        |
| Dde_2989 | tuf       | 0,60               | 4,67    | Translation elongation factor Tu                                                    |
| Dde_2897 |           | 0,58               | 2,35    | Transposase and inactivated derivatives                                             |
| Dde_3372 |           | 0,57               | 5,11    | Conserved hypothetical protein                                                      |
| Dde_0533 |           | 0,57               | 3,02    | FOG: CheY-like receiver                                                             |
| Dde_0082 | hydB      | 0,57               | 5,53    | Periplasmic (fe) hydrogenase small subunit precursor                                |
| Dde_3243 |           | 0,57               | 5,61    | Phosphate acetyltransferase, putative                                               |
| Dde_0761 |           | 0,56               | 3,86    | hypothetical protein                                                                |
| Dde_3242 | ackA      | 0,56               | 5,45    | acetate kinase                                                                      |
| Dde_0894 |           | 0,56               | 4,43    | hypothetical protein                                                                |
| Dde_2922 | norQ      | 0,56               | 3,55    | NorQ protein (norQ)                                                                 |
| Dde_0710 |           | 0,56               | 2,40    | Phosphoglycerate transport system transcriptional regulatory protein PgtA, putative |
| Dde_0947 |           | 0,55               | 3,47    | hypothetical protein                                                                |
| Dde_3324 | phnC      | 0,55               | 4,86    | ATP-binding component of phosphonate transport                                      |
| Dde_0017 |           | 0,55               | 2,11    | sun protein                                                                         |
| Dde_0913 |           | 0,54               | 4,74    | hypothetical protein                                                                |

**Downregulated**

| Gene ID  | Gene name | Log <sub>2</sub> R | Z-score | Annotation                                                |
|----------|-----------|--------------------|---------|-----------------------------------------------------------|
| Dde_0283 |           | -2,98              | -5,61   | Conserved hypothetical protein                            |
| Dde_2152 |           | -2,82              | -5,61   | hypothetical protein                                      |
| Dde_2154 |           | -2,78              | -5,61   | Biopolymer transport proteins                             |
| Dde_3667 | fld       | -2,68              | -5,61   | Flavodoxin, iron-repressed (Dmitry Rodionov)              |
| Dde_2153 |           | -2,64              | -5,61   | Biopolymer transport proteins                             |
| Dde_2670 | feoA      | -2,50              | -5,61   | ferrous iron transporter component feoA (Dmitry Rodionov) |
| Dde_2672 |           | -2,44              | -5,61   | hypothetical protein                                      |
| Dde_3199 |           | -2,29              | -5,61   | hypothetical protein                                      |
| Dde_0111 |           | -2,24              | -5,61   | Zinc resistance-associated protein precursor, putative    |
| Dde_3197 |           | -2,18              | -5,61   | hypothetical protein                                      |
| Dde_2669 | feoB      | -2,06              | -5,61   | ferrous iron transport protein B                          |
| Dde_2673 | feoA      | -1,98              | -5,61   | ferrous iron transporter component feoA (Dmitry Rodionov) |
| Dde_3198 |           | -1,94              | -5,61   | Uncharacterized ACR, COG1433 family                       |

|          |       |       |       |                                                                            |
|----------|-------|-------|-------|----------------------------------------------------------------------------|
| Dde_2155 |       | -1,90 | -5,61 | Biopolymer transport protein                                               |
| Dde_1312 |       | -1,76 | -5,61 | Copper chaperone                                                           |
| Dde_3202 | mrp   | -1,71 | -5,61 | Mrp protein (mrp)                                                          |
| Dde_3200 |       | -1,67 | -5,61 | Iron-sulfur cluster binding protein                                        |
| Dde_3713 | mtrA  | -1,60 | -5,61 | DNA-binding response regulator (mtrA)                                      |
| Dde_2156 |       | -1,60 | -5,61 | TonB-like                                                                  |
| Dde_2020 |       | -1,57 | -5,61 | Conserved hypothetical protein                                             |
| Dde_3711 |       | -1,55 | -5,61 | Conserved hypothetical protein                                             |
| Dde_3712 |       | -1,53 | -5,61 | Universal stress protein family family                                     |
| Dde_0444 | pqqL  | -1,53 | -5,61 | Putative peptidase                                                         |
| Dde_3709 | tmcB  | -1,51 | -5,61 | Transmembrane complex, ferredoxin, 2 [4Fe-4S] (Shelley Haveman)            |
| Dde_2819 |       | -1,49 | -5,42 | hypothetical protein                                                       |
| Dde_3707 |       | -1,49 | -5,61 | hypothetical protein                                                       |
| Dde_3146 |       | -1,43 | -5,61 | hypothetical protein                                                       |
| Dde_0445 |       | -1,40 | -5,61 | ABC transporter, ATP-binding protein, putative                             |
| Dde_2157 |       | -1,38 | -5,61 | TPR repeat-containing protein                                              |
| Dde_2135 | hysA  | -1,37 | -5,61 | periplasmic [NiFeSe] hydrogenase, large subunit, selenocysteine-containing |
| Dde_2134 |       | -1,33 | -5,61 | hydrogenase (NiFe) small subunit HydA                                      |
| Dde_3144 |       | -1,27 | -5,61 | hypothetical protein                                                       |
| Dde_1611 |       | -1,21 | -5,61 | AraC family transcriptional regulator                                      |
| Dde_3714 | divK  | -1,16 | -5,61 | Nitrogen regulation protein NtrX (divK)                                    |
| Dde_3201 |       | -1,12 | -5,61 | Iron-sulfur cluster binding protein                                        |
| Dde_3710 | tmcA  | -1,02 | -5,61 | Transmembrane complex, tetraheme cytochrome c3 (Shelley Haveman)           |
| Dde_1143 |       | -1,01 | -5,55 | Conserved hypothetical protein                                             |
| Dde_0282 |       | -1,01 | -4,13 | Conserved hypothetical protein                                             |
| Dde_3708 | tmcC  | -1,00 | -5,61 | Transmembrane complex, integral membrane protein (Shelley Haveman)         |
| Dde_3046 |       | -0,99 | -5,61 | Conserved hypothetical protein                                             |
| Dde_2560 |       | -0,90 | -4,19 | Thioredoxin peroxidase                                                     |
| Dde_0484 |       | -0,89 | -5,61 | Conserved hypothetical protein                                             |
| Dde_3666 |       | -0,86 | -5,07 | hypothetical protein                                                       |
| Dde_0607 |       | -0,82 | -5,61 | hypothetical protein                                                       |
| Dde_0483 |       | -0,80 | -5,61 | MoxR-like ATPases                                                          |
| Dde_2641 | b0873 | -0,76 | -3,32 | hybrid cluster protein                                                     |
| Dde_3048 | gdp   | -0,75 | -4,63 | FOG: GGDEF domain                                                          |
| Dde_2561 |       | -0,74 | -5,03 | Rhodanese-like domain protein                                              |
| Dde_3045 |       | -0,71 | -5,57 | Conserved hypothetical protein                                             |

**Supplemental Table S4B:** TOP 30 up- or downregulated genes in *Dv. alaskensis* str. G20 grown under syntrophic conditions with *Methanospirillum hungatei* at 0.027 h<sup>-1</sup> growth rate

Upregulated

| Gene ID  | Gene name | Log <sub>2</sub> R | Z-score | Annotation                                                    |
|----------|-----------|--------------------|---------|---------------------------------------------------------------|
| Dde_0715 |           | 3,60               | 5,61    | hypothetical protein                                          |
| Dde_0717 |           | 2,90               | 5,61    | formate dehydrogenase, alpha subunit                          |
| Dde_0718 |           | 2,20               | 5,61    | Anaerobic dimethyl sulfoxide reductase chain b (hybA)         |
| Dde_0719 |           | 1,91               | 5,61    | Fe-S cluster domain protein                                   |
| Dde_3211 |           | 1,88               | 4,82    | split soret cytochrome c precursor                            |
| Dde_1074 |           | 1,50               | 5,61    | Putative permease                                             |
| Dde_0227 | cstA      | 1,49               | 4,98    | Carbon starvation protein                                     |
| Dde_3182 |           | 1,19               | 4,20    | Cytochrome c <sub>3</sub> precursor                           |
| Dde_2982 | rpmE      | 1,19               | 5,61    | Ribosomal protein L31                                         |
| Dde_0234 |           | 1,18               | 5,38    | Conserved hypothetical protein                                |
| Dde_3239 | glcD      | 1,01               | 5,15    | Glycolate oxidase subunit D                                   |
| Dde_0608 | livF      | 1,00               | 2,54    | ATP-binding component of leucine transport                    |
| Dde_3245 |           | 0,96               | 5,32    | Iron-sulfur cluster binding protein                           |
| Dde_3444 |           | 0,94               | 4,62    | hypothetical protein                                          |
| Dde_3242 | ackA      | 0,93               | 5,61    | acetate kinase                                                |
| Dde_3240 |           | 0,91               | 5,61    | Glycolate oxidase iron-sulfur subunit, putative               |
| Dde_0645 |           | 0,89               | 4,69    | hypothetical protein                                          |
| Dde_3243 |           | 0,88               | 5,61    | Phosphate acetyltransferase, putative                         |
| Dde_3237 |           | 0,80               | 5,61    | Putative oxidoreductase, Fe-S subunit                         |
| Dde_3028 | cooS      | 0,79               | 5,05    | carbon-monoxide dehydrogenase, catalytic subunit              |
| Dde_0876 |           | 0,79               | 5,10    | Uncharacterised protein family UPF0324                        |
| Dde_3217 | pssA      | 0,77               | 4,21    | CDP-diacylglycerol--serine O-phosphatidyltransferase          |
| Dde_3159 | flgF      | 0,77               | 5,61    | Flagellar basal-body rod protein FlgF (flgF)                  |
| Dde_2989 | tuf       | 0,77               | 5,61    | Translation elongation factor Tu                              |
| Dde_3244 |           | 0,73               | 5,61    | Uncharacterized ACR, YkgG family COG1556 family               |
| Dde_3029 | cooC-2    | 0,69               | 4,95    | CODH nickel-insertion accessory protein (cooC-2)              |
| Dde_3238 |           | 0,68               | 5,61    | L-lactate permease, putative                                  |
| Dde_3158 | flgG      | 0,68               | 5,61    | Flagellar biosynthesis, cell-distal portion of basal-body rod |
| Dde_1427 |           | 0,68               | 2,26    | hypothetical protein                                          |
| Dde_3241 | pta       | 0,66               | 5,38    | Phosphotransacetylase                                         |

Downregulated

| Gene ID  | Gene name | Log <sub>2</sub> R | Z-score | Annotation                                                           |
|----------|-----------|--------------------|---------|----------------------------------------------------------------------|
| Dde_2154 |           | -3,06              | -5,61   | Biopolymer transport proteins                                        |
| Dde_2152 |           | -2,93              | -5,61   | hypothetical protein                                                 |
| Dde_3667 | fld       | -2,83              | -5,61   | Flavodoxin, iron-repressed (Dmitry Rodionov)                         |
| Dde_0283 |           | -2,76              | -5,61   | Conserved hypothetical protein                                       |
| Dde_2153 |           | -2,74              | -5,61   | Biopolymer transport proteins                                        |
| Dde_2670 | feoA      | -2,45              | -5,61   | ferrous iron transporter component feoA (Dmitry Rodionov)            |
| Dde_0111 |           | -2,30              | -5,61   | Zinc resistance-associated protein precursor. {escherichia, putative |
| Dde_2672 |           | -2,25              | -5,61   | hypothetical protein                                                 |
| Dde_2669 | feoB      | -2,17              | -5,61   | ferrous iron transport protein B                                     |
| Dde_3199 |           | -2,10              | -5,61   | hypothetical protein                                                 |
| Dde_2155 |           | -2,08              | -5,61   | Biopolymer transport protein                                         |
| Dde_3197 |           | -1,94              | -5,61   | hypothetical protein                                                 |
| Dde_3198 |           | -1,88              | -5,61   | Uncharacterized ACR, COG1433 family                                  |
| Dde_3712 |           | -1,81              | -5,61   | Universal stress protein family family                               |
| Dde_3713 | mtrA      | -1,81              | -5,61   | DNA-binding response regulator (mtrA)                                |
| Dde_2673 | feoA      | -1,80              | -5,61   | ferrous iron transporter component feoA (Dmitry Rodionov)            |
| Dde_2156 |           | -1,76              | -5,61   | TonB-like                                                            |
| Dde_1312 |           | -1,76              | -5,61   | Copper chaperone                                                     |
| Dde_3202 | mrp       | -1,74              | -5,61   | Mrp protein (mrp)                                                    |
| Dde_0444 | pqqL      | -1,73              | -5,61   | Putative peptidase                                                   |
| Dde_3200 |           | -1,67              | -5,61   | Iron-sulfur cluster binding protein                                  |
| Dde_2819 |           | -1,65              | -5,61   | hypothetical protein                                                 |
| Dde_3711 |           | -1,64              | -5,61   | Conserved hypothetical protein                                       |
| Dde_3709 | tmcB      | -1,62              | -5,61   | Transmembrane complex, ferredoxin, 2 [4Fe-4S] (Shelley Haveman)      |
| Dde_3707 |           | -1,60              | -5,61   | hypothetical protein                                                 |
| Dde_0445 |           | -1,53              | -5,61   | ABC transporter, ATP-binding protein, putative                       |
| Dde_2157 |           | -1,43              | -5,61   | TPR repeat-containing protein                                        |
| Dde_3146 |           | -1,27              | -5,61   | hypothetical protein                                                 |
| Dde_3714 | divK      | -1,23              | -5,61   | Nitrogen regulation protein NtrX (divK)                              |
| Dde_1611 |           | -1,21              | -4,15   | AraC family transcriptional regulator                                |

**Supplemental Figure S5:** Relative number of significantly up- or downregulated genes of each COG functional category during syntrophic growth at low growth rate for each coculture pairing (absolute Z score > 2.0; absolute log<sub>2</sub> R > 0.5; categories enriched in differentially expressed genes relative to the total number of gene in that category are listed on the side). Categories are as follows: amino acid transport (E), carbohydrate transport and metabolism (G), cell division and chromosome partitioning (D), cell motility and secretion (N), cell envelope biogenesis (M), chromatin structure and dynamics (B), coenzyme metabolism (H), defense mechanism (V), energy production and conservation (C), function unknown (S), general function prediction only (R), inorganic ion transport and metabolism (P), intracellular trafficking and secretion (U), lipid metabolism (I), nucleotide transport and metabolism (F), post-translational modification, protein turnover, chaperones (O), DNA replication, recombination and repair (L), secondary metabolites biosynthesis, transport and catabolism (Q), signal transduction mechanisms (T), transcription (K), and translation, ribosomal structures and biogenesis (J).

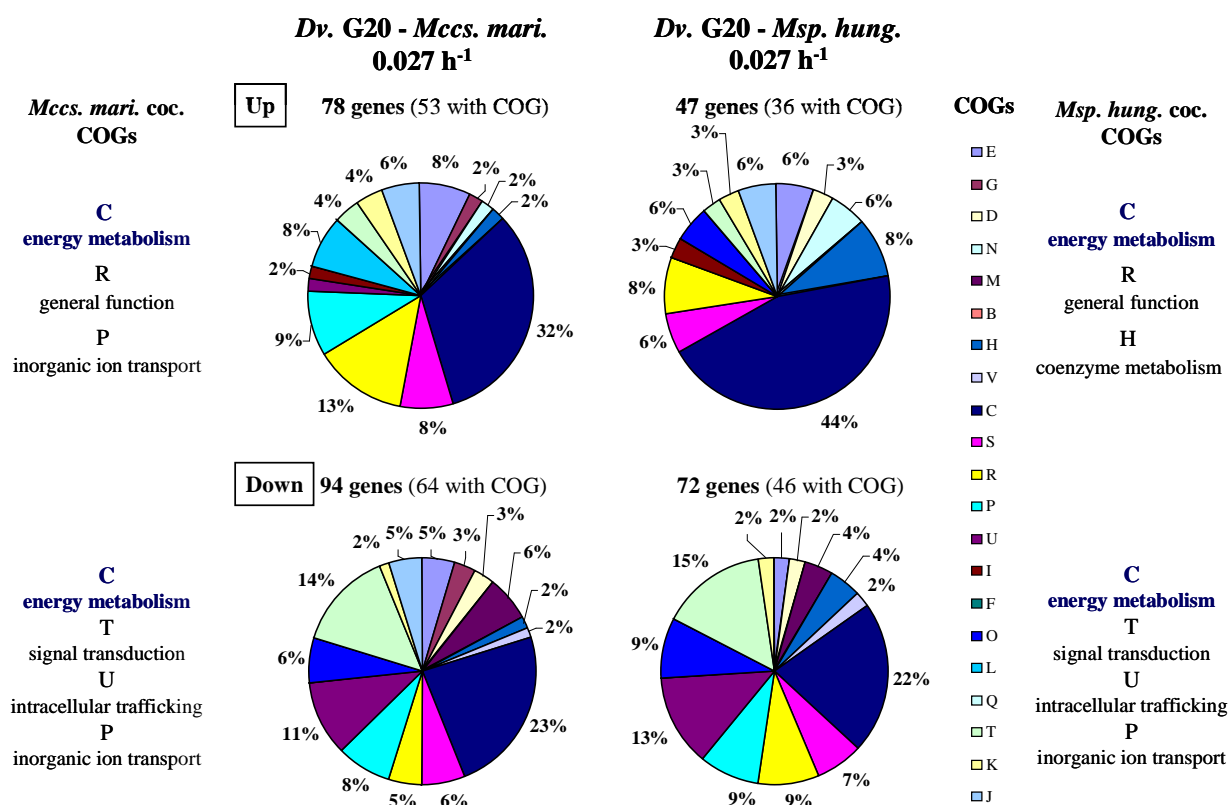

**Supplemental Figure S6:** Log<sub>2</sub>R data sets of *D. alaskensis* str. G20 grown syntrophically at low growth rate of 0.027 h<sup>-1</sup> with *M. maripaludis* or *M. hungatei* plotted against the log<sub>2</sub>R data of syntrophic growth at high rate of 0.047 h<sup>-1</sup> (panel A or B, respectively) and against each other (panel C).

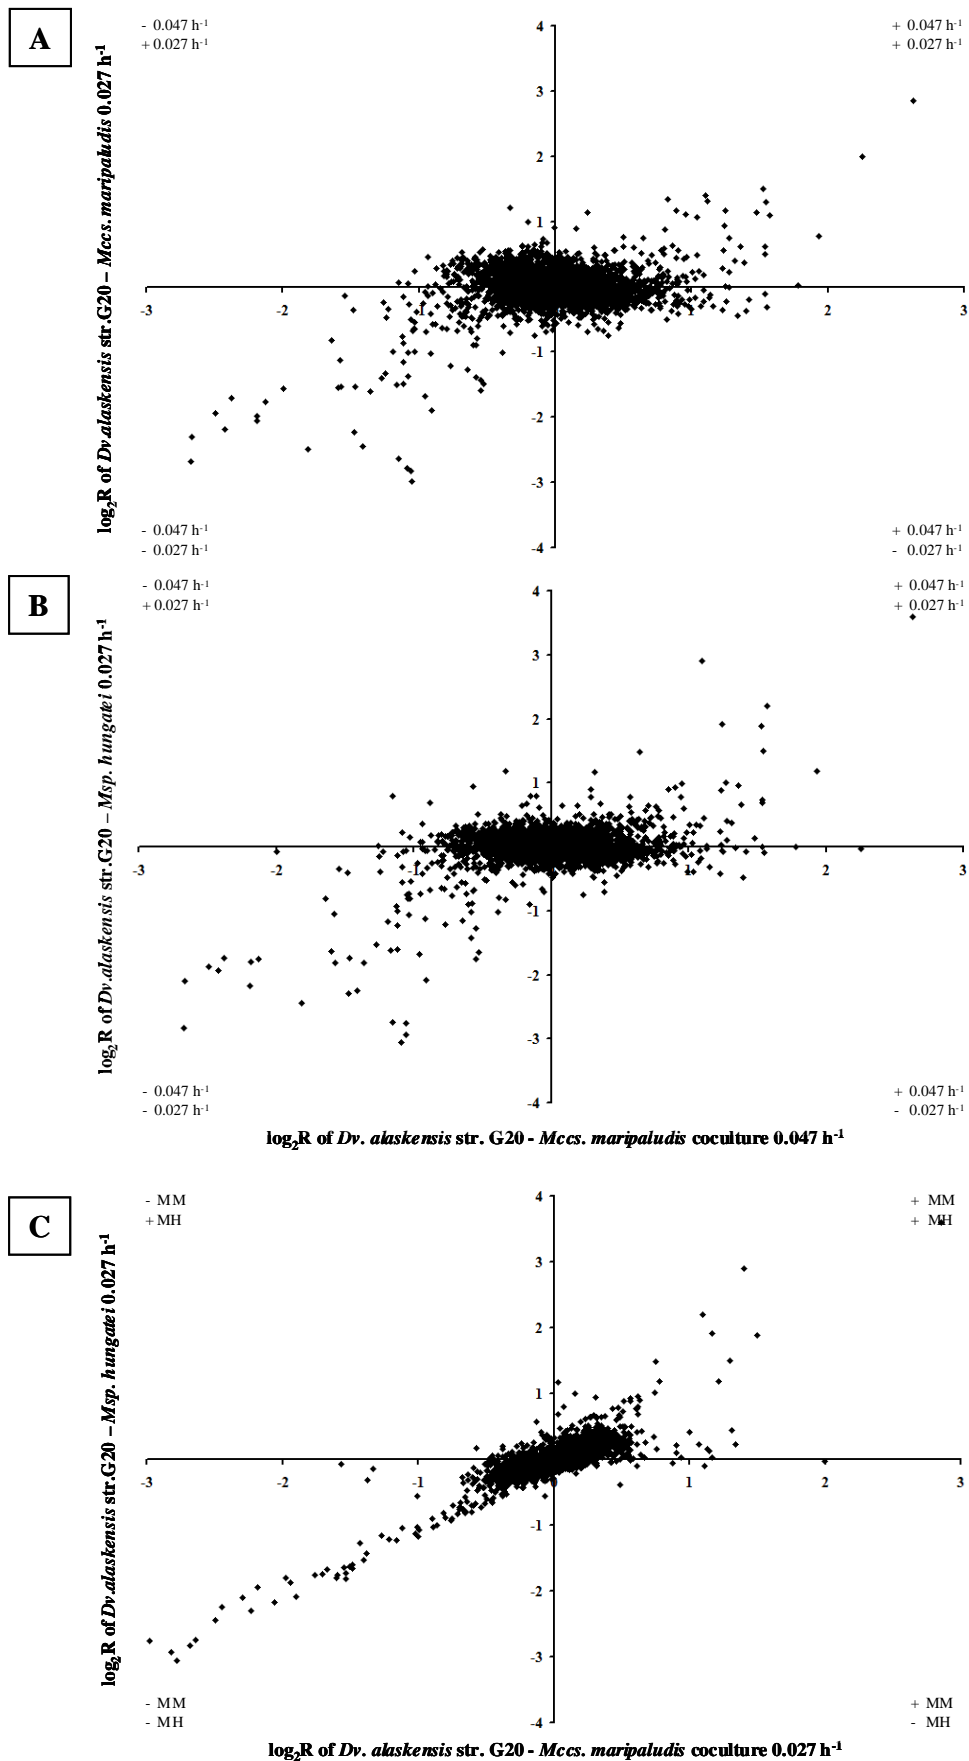

**Supplemental Table S7:** Differentially up-/downregulated genes of *Desulfovibrio alaskensis* str. G20 in syntrophic coculture with *Methanococcus maripaludis* at different growth rates (0.047 h<sup>-1</sup> or 0.027h<sup>-1</sup>) (list is organized by G20 gene ID number)

| G20 Gene ID                                          | log <sub>2</sub> R<br>0.047<br>h <sup>-1</sup><br>MM | Z-<br>score | log <sub>2</sub> R<br>0.027<br>h <sup>-1</sup><br>MM | Z-<br>score | Abs.<br>differ-<br>ence<br>log <sub>2</sub> R | Abs.<br>log <sub>2</sub><br>0.027<br>h <sup>-1</sup><br>MM | Gene<br>name | CO<br>G                                              | Annotation                                                                     |
|------------------------------------------------------|------------------------------------------------------|-------------|------------------------------------------------------|-------------|-----------------------------------------------|------------------------------------------------------------|--------------|------------------------------------------------------|--------------------------------------------------------------------------------|
| <b>Downregulated under both conditions</b>           |                                                      |             |                                                      |             |                                               |                                                            |              |                                                      |                                                                                |
| Dde_0111                                             | -0,92                                                | -4,33       | -2,24                                                | -5,61       | 1,31                                          | 0,99                                                       | pqqL         | R                                                    | Zinc resistance-associated protein precursor, putative                         |
| Dde_0444                                             | -2,37                                                | -5,45       | -1,53                                                | -5,61       | 0,84                                          | -0,63                                                      |              | U                                                    | Putative peptidase                                                             |
| Dde_0445                                             | -2,36                                                | -5,52       | -1,40                                                | -5,61       | 0,96                                          | -0,08                                                      | R            | U                                                    | ABC transporter, ATP-binding protein, putative                                 |
| Dde_0446                                             | -1,59                                                | -4,23       | -0,67                                                | -4,39       | 0,92                                          | -0,42                                                      |              | R                                                    | hypothetical protein                                                           |
| Dde_0447                                             | -1,79                                                | -3,98       | -0,65                                                | -4,28       | 1,14                                          | -0,03                                                      | R            | Orf, hypothetical protein                            |                                                                                |
| Dde_0448                                             | -1,19                                                | -4,47       | -0,46                                                | -4,59       | 0,73                                          | -0,21                                                      | U            | U                                                    | ABC transporter, periplasmic substrate-binding protein                         |
| Dde_0449                                             | -1,35                                                | -4,54       | -0,69                                                | -4,92       | 0,66                                          | -0,60                                                      |              | U                                                    | Putative transport system permease protein                                     |
| Dde_0450                                             | -1,15                                                | -4,57       | -0,45                                                | -5,52       | 0,70                                          | -0,30                                                      | U            | U                                                    | Putative transport system permease protein                                     |
| Dde_0451                                             | -1,08                                                | -3,95       | -0,36                                                | -4,72       | 0,72                                          | -0,56                                                      |              | U                                                    | Putative ATP-binding component of a transport system                           |
| Dde_0452                                             | -1,17                                                | -3,23       | -0,64                                                | -4,81       | 0,52                                          | -0,51                                                      | R            | hypothetical protein                                 |                                                                                |
| Dde_0453                                             | -1,35                                                | -4,41       | -0,65                                                | -5,61       | 0,70                                          | -0,36                                                      | U            | U                                                    | biopolymer transport proteins-like                                             |
| Dde_0454                                             | -1,26                                                | -4,89       | -0,54                                                | -5,61       | 0,72                                          | -0,46                                                      |              | U                                                    | biopolymer transport proteins-like                                             |
| Dde_0457                                             | -1,25                                                | -2,29       | -0,58                                                | -4,56       | 0,67                                          | -0,24                                                      | U            | Putative Zn-dependent protease, contains TPR repeats |                                                                                |
| Dde_1143                                             | -0,50                                                | -4,04       | -1,01                                                | -5,55       | 0,51                                          | 2,67                                                       | M            | U                                                    | Conserved hypothetical protein                                                 |
| Dde_1150                                             | -0,77                                                | -2,57       | -0,25                                                | -2,93       | 0,53                                          | 1,51                                                       |              | U                                                    | 17 kDa surface antigen                                                         |
| Dde_1151                                             | -1,10                                                | -1,93       | -0,60                                                | -3,91       | 0,50                                          | -0,10                                                      | T            | U                                                    | Response regulator containing a CheY-like receiver domain and an HD-GYP domain |
| Dde_1175                                             | -1,01                                                | -3,03       | -0,44                                                | -4,28       | 0,57                                          | 4,45                                                       |              | U                                                    | RNA-binding protein                                                            |
| Dde_1178                                             | -1,13                                                | -4,24       | -0,47                                                | -4,87       | 0,65                                          | 2,92                                                       | G            | U                                                    | Putative dihydroxyacetone kinase                                               |
| Dde_1312                                             | -2,48                                                | -5,02       | -1,76                                                | -5,61       | 0,72                                          | 0,76                                                       |              | P                                                    | Copper chaperone                                                               |
| Dde_2067                                             | -0,73                                                | -2,05       | -0,15                                                | -2,70       | 0,58                                          | 3,42                                                       | U            | U                                                    | thioredoxin                                                                    |
| Dde_2155                                             | -2,43                                                | -4,89       | -1,90                                                | -5,61       | 0,53                                          | -0,20                                                      |              | U                                                    | Biopolymer transport protein                                                   |
| Dde_2170                                             | -1,45                                                | -5,10       | -0,14                                                | -3,03       | 1,31                                          | 4,09                                                       | S            | U                                                    | Uncharacterized conserved protein                                              |
| Dde_2241                                             | -0,74                                                | -5,61       | -0,25                                                | -5,47       | 0,49                                          | 2,00                                                       |              | J                                                    | Ribosomal protein L18                                                          |
| Dde_2244                                             | -0,97                                                | -5,61       | -0,41                                                | -5,61       | 0,56                                          | 1,54                                                       | J            | Ribosomal protein S14p/S29e                          |                                                                                |
| <b>Upregulated under both conditions</b>             |                                                      |             |                                                      |             |                                               |                                                            |              |                                                      |                                                                                |
| Dde_0286                                             | 2,57                                                 | 3,90        | 1,31                                                 | 5,61        | 1,26                                          | 4,31                                                       | C            | C                                                    | Ferredoxin II (Sean Caffrey)                                                   |
| Dde_0346                                             | 0,88                                                 | 2,71        | 0,40                                                 | 3,28        | 0,49                                          | 2,09                                                       |              | K                                                    | Transcriptional regulator, putative                                            |
| Dde_0608                                             | 1,18                                                 | 3,12        | 0,16                                                 | 2,12        | 1,02                                          | 0,17                                                       | E            | E                                                    | ATP-binding component of leucine transport                                     |
| Dde_0612                                             | 1,04                                                 | 2,93        | 0,18                                                 | 1,59        | 0,87                                          | 1,06                                                       |              | E                                                    | High-affinity leucine-specific transport system; periplasmic binding protein   |
| Dde_0718                                             | 1,85                                                 | 5,61        | 1,10                                                 | 5,61        | 0,75                                          | 1,48                                                       | C            | C                                                    | Anaerobic dimethyl sulfoxide reductase chain b (hybA)                          |
| Dde_0806                                             | 1,77                                                 | 4,63        | 1,14                                                 | 5,61        | 0,62                                          | 1,62                                                       |              | P                                                    | Rhodanese-like domain protein                                                  |
| Dde_2906                                             | 0,94                                                 | 3,05        | 0,44                                                 | 3,29        | 0,50                                          | 0,31                                                       | K            | K                                                    | Fis family transcriptional regulator                                           |
| Dde_2956                                             | 0,73                                                 | 1,95        | 0,20                                                 | 2,39        | 0,54                                          | 1,62                                                       |              | K                                                    | Orf, hypothetical protein                                                      |
| Dde_2982                                             | 1,83                                                 | 4,98        | 0,78                                                 | 5,00        | 1,06                                          | 3,95                                                       | J            | J                                                    | Ribosomal protein L31                                                          |
| Dde_2986                                             | 1,10                                                 | 2,61        | 0,24                                                 | 2,72        | 0,86                                          | 1,48                                                       |              | M                                                    | UDP-3-0-acyl N-acetylglucosamine deacetylase                                   |
| Dde_3004                                             | 0,57                                                 | 2,04        | 0,04                                                 | 2,05        | 0,53                                          | 0,18                                                       | G            | G                                                    | Phosphoglyceromutase I                                                         |
| Dde_3149                                             | 0,60                                                 | 4,46        | 0,09                                                 | 2,58        | 0,51                                          | 0,68                                                       |              | S                                                    | Uncharacterized BCR, COG1699 family (yviF)                                     |
| Dde_3150                                             | 1,30                                                 | 4,73        | 0,23                                                 | 2,79        | 1,07                                          | 1,86                                                       | T            | T                                                    | carbon storage regulator                                                       |
| Dde_3184                                             | 0,85                                                 | 3,98        | 0,23                                                 | 2,21        | 0,62                                          | 2,08                                                       |              | U                                                    | Conserved hypothetical protein                                                 |
| Dde_3215                                             | 0,81                                                 | 3,31        | 0,21                                                 | 1,97        | 0,60                                          | 1,18                                                       | R            | R                                                    | Haloacid dehalogenase-like hydrolase superfamily                               |
| Dde_3324                                             | 0,06                                                 | -1,29       | 0,55                                                 | 4,86        | 0,49                                          | -0,12                                                      |              | P                                                    | ATP-binding component of phosphonate transport                                 |
| Dde_3337                                             | 1,57                                                 | 4,02        | 0,39                                                 | 2,10        | 1,18                                          | 3,81                                                       | C            | C                                                    | nigerythrin                                                                    |
| Dde_3492                                             | 0,70                                                 | 2,80        | 0,09                                                 | 1,98        | 0,61                                          | -0,29                                                      |              | P                                                    | ammonium transporter                                                           |
| Dde_3493                                             | 1,17                                                 | 2,98        | 0,29                                                 | 2,04        | 0,88                                          | -0,05                                                      | E            | Nitrogen regulatory protein PII                      |                                                                                |
| <b>Differently regulated between both conditions</b> |                                                      |             |                                                      |             |                                               |                                                            |              |                                                      |                                                                                |
| Dde_0098                                             | 0,68                                                 | 1,48        | -0,29                                                | -2,53       | 0,97                                          | 0,21                                                       | T            | T                                                    | Universal stress protein family family                                         |
| Dde_0099                                             | 0,33                                                 | 1,93        | -0,17                                                | -2,13       | 0,50                                          | 0,64                                                       |              | J                                                    | asparaginyl-tRNA synthetase                                                    |
| Dde_0150                                             | 0,21                                                 | 1,90        | -0,31                                                | -3,42       | 0,51                                          | 0,98                                                       | H            | H                                                    | 3-octaprenyl-4-hydroxybenzoate carboxy-lyase                                   |
| Dde_0151                                             | 0,29                                                 | 2,04        | -0,46                                                | -3,92       | 0,75                                          | 0,34                                                       |              | R                                                    | Unnamed protein product                                                        |
| Dde_0153                                             | -0,34                                                | -2,49       | 0,38                                                 | 3,71        | 0,71                                          | -0,19                                                      | O            | O                                                    | hypothetical protein                                                           |
| Dde_0154                                             | -0,61                                                | -3,60       | 0,27                                                 | 4,54        | 0,88                                          | -0,67                                                      |              | O                                                    | Molybdenum ABC transporter, permease protein (modB)                            |
| Dde_0155                                             | -0,71                                                | -3,26       | 0,31                                                 | 3,66        | 1,02                                          | -0,45                                                      | P            | P                                                    | molybdenum ABC transporter, periplasmic molybdate-binding protein              |
| Dde_0186                                             | 0,61                                                 | 2,82        | -0,33                                                | -3,92       | 0,94                                          | 1,80                                                       |              | ET                                                   | Arginine 3rd transport system periplasmic binding protein                      |
| Dde_0188                                             | -0,39                                                | -2,32       | 0,30                                                 | 2,93        | 0,69                                          | -0,18                                                      | E            | E                                                    | Beta-lysine N-acetyltransferase (Natalia Ivanova)                              |
| Dde_0189                                             | -0,37                                                | -2,29       | 0,26                                                 | 2,93        | 0,63                                          | -0,05                                                      |              | E                                                    | Lysine 2,3-aminomutase (Natalia Ivanova)                                       |
| Dde_0194                                             | 0,64                                                 | 2,88        | -0,25                                                | -1,94       | 0,89                                          | 0,60                                                       | R            | R                                                    | Glycophorin-binding protein family                                             |
| Dde_0223                                             | -0,40                                                | -2,52       | 0,29                                                 | 4,54        | 0,69                                          | -0,55                                                      |              | R                                                    | Flavoprotein reductase                                                         |
| Dde_0224                                             | -0,50                                                | -3,26       | 0,36                                                 | 3,33        | 0,86                                          | -0,51                                                      | K            | K                                                    | Rrf2 protein (rrf2)                                                            |
| Dde_0232                                             | -0,50                                                | -3,24       | 0,32                                                 | 3,75        | 0,83                                          | -0,34                                                      |              | V                                                    | Sulfate ABC transporter, ATP-binding protein (cysA)                            |
| Dde_0233                                             | -0,51                                                | -1,96       | 0,30                                                 | 3,62        | 0,81                                          | -0,26                                                      | H            | ABC transporter, permease protein (cysW)             |                                                                                |

|          |       |       |       |       |      |       |       |    |                                                                                                  |
|----------|-------|-------|-------|-------|------|-------|-------|----|--------------------------------------------------------------------------------------------------|
| Dde_0263 | -0,55 | -2,58 | 0,27  | 2,09  | 0,82 | -0,35 |       | T  | Response regulator containing a CheY-like receiver domain and an HD-GYP domain                   |
| Dde_0303 | 0,57  | 2,29  | -0,24 | -2,45 | 0,81 | 1,30  |       | K  | Transcriptional regulator, putative                                                              |
| Dde_0321 | 0,55  | 2,35  | -0,24 | -3,07 | 0,79 | 0,57  |       | TK | DNA-binding response regulator, putative                                                         |
| Dde_0325 | 0,31  | 1,98  | -0,49 | -4,51 | 0,80 | 0,74  |       |    | hypothetical protein                                                                             |
| Dde_0326 | 0,17  | 2,60  | -0,67 | -5,54 | 0,84 | 0,50  |       | P  | Putative a membrane protein                                                                      |
| Dde_0327 | 0,22  | 2,33  | -0,55 | -5,34 | 0,76 | 2,45  |       | T  | Response regulator containing CheY-like receiver, AAA-type ATPase, and DNA-binding domains       |
| Dde_0348 | -0,41 | -2,40 | 0,24  | 2,17  | 0,65 | -0,44 |       | S  | Conserved hypothetical protein                                                                   |
| Dde_0384 | 0,63  | 3,12  | -0,19 | -3,21 | 0,82 | 1,90  | cheY  | T  | Chemotaxis regulator transmits chemoreceptor signals to flagellar motor components               |
| Dde_0441 | 0,33  | 1,72  | -0,18 | -2,32 | 0,50 | 0,04  |       | R  | Multimeric flavodoxin WrB                                                                        |
| Dde_0473 | -0,45 | -3,51 | 0,19  | 3,07  | 0,65 | -0,61 |       | R  | formate dehydrogenase, alpha subunit                                                             |
| Dde_0474 | -0,61 | -4,11 | 0,09  | 2,26  | 0,69 | -0,34 | fhcB  | C  | Hydrogenase FeS protein, cytoplasmic (Shelley Haveman)                                           |
| Dde_0475 | -0,49 | -3,51 | 0,12  | 2,03  | 0,61 | -0,22 | fhcC  | R  | Fe-only hydrogenase, large & small subunits, cytoplasmic (Shelley Haveman)                       |
| Dde_0476 | -0,13 | -2,42 | 0,36  | 1,98  | 0,49 | -0,73 | fhcD  | C  | Hydrogenase FeS protein, cytoplasmic (Shelley Haveman)                                           |
| Dde_0477 | -0,66 | -1,70 | 0,40  | 3,42  | 1,06 | -0,13 |       | L  | transposase IS200-family protein                                                                 |
| Dde_0561 | -0,21 | -1,97 | 0,31  | 2,28  | 0,51 | -0,43 |       |    | Cytochrome c subfamily, putative                                                                 |
| Dde_0628 | -0,28 | -2,72 | 0,22  | 2,33  | 0,50 | -0,45 |       | L  | DNA polymerase III, alpha subunit (gram-positive)                                                |
| Dde_0629 | -0,55 | -3,72 | 0,25  | 2,68  | 0,80 | -0,50 |       | T  | Predicted signal-transduction protein containing cAMP-binding and CBS domains                    |
| Dde_0630 | -0,42 | -3,79 | 0,16  | 2,68  | 0,58 | -0,44 |       | R  | Putative transport protein                                                                       |
| Dde_0631 | -0,43 | -2,92 | 0,18  | 2,12  | 0,61 | -0,84 |       | S  | Predicted membrane protein                                                                       |
| Dde_0650 | 0,36  | 3,39  | -0,25 | -2,23 | 0,61 | 1,10  | hmcD  |    | HmcD, 5.8 kd protein in hmc operon (voordouw)                                                    |
| Dde_0667 | -0,27 | -1,63 | 0,40  | 2,82  | 0,66 | 0,10  |       | R  | Metal-dependent hydrolase                                                                        |
| Dde_0668 | -0,72 | -2,46 | 0,15  | 2,15  | 0,88 | -0,52 | bcr   | G  | Bicyclomycin resistance protein; transmembrane protein                                           |
| Dde_0673 | -0,74 | -2,65 | 0,45  | 3,47  | 1,19 | -0,17 | proV  | E  | ATP-binding component of transport system for glycine, betaine and proline                       |
| Dde_0693 | 0,36  | 4,39  | -0,35 | -2,41 | 0,71 | 4,19  |       | P  | Putative transport protein                                                                       |
| Dde_0694 | 0,93  | 4,90  | -0,23 | -2,31 | 1,16 | 4,28  | cheYI | TK | Chemotaxis protein CheYI (cheYI)                                                                 |
| Dde_0704 | 0,47  | 2,09  | -0,20 | -1,90 | 0,67 | 0,94  |       | O  | Peptide methionine sulfoxide reductase                                                           |
| Dde_0729 | -0,55 | -2,70 | 0,11  | 2,00  | 0,66 | -0,29 |       |    | hypothetical protein                                                                             |
| Dde_0730 | -0,40 | -2,71 | 0,13  | 2,32  | 0,53 | -0,41 |       | V  | ABC-type antimicrobial peptide transport system, permease component                              |
| Dde_0731 | -0,39 | -2,80 | 0,12  | 1,98  | 0,51 | -0,14 |       | V  | ABC transporter, ATP-binding protein                                                             |
| Dde_0793 | 0,80  | 3,45  | -0,37 | -3,70 | 1,17 | 4,35  |       |    | RNA-binding proteins (RRM domain)                                                                |
| Dde_0795 | -0,57 | -1,72 | 0,34  | 2,54  | 0,91 | -0,18 |       |    | hypothetical protein                                                                             |
| Dde_0809 | -1,27 | -2,40 | 0,24  | 2,20  | 1,52 | 5,16  |       | J  | Endoribonuclease L-PSP, putative                                                                 |
| Dde_0836 | -0,46 | -3,04 | 0,32  | 2,39  | 0,78 | -0,40 | capK  | H  | capK-related protein probably involved in cell wall biogenesis (Morgan Price)                    |
| Dde_0837 | -0,51 | -2,97 | 0,29  | 3,99  | 0,80 | -0,19 |       | M  | Glycosyltransferases, probably involved in cell wall biogenesis                                  |
| Dde_0838 | -0,61 | -3,03 | 0,30  | 4,40  | 0,91 | -0,47 |       | M  | glycosyl transferase, group 1 family protein                                                     |
| Dde_0839 | -0,33 | -3,19 | 0,44  | 3,85  | 0,78 | -0,08 |       | M  | Glycosyltransferase                                                                              |
| Dde_0840 | -0,48 | -2,72 | 0,21  | 2,30  | 0,69 | -0,04 |       |    | hypothetical protein                                                                             |
| Dde_0843 | -0,45 | -2,11 | 0,11  | 1,61  | 0,56 | 0,30  |       | R  | cell wall biosynthesis glycosyltransferase-like protein                                          |
| Dde_0860 | 0,35  | 2,23  | -0,16 | -3,02 | 0,51 | 0,13  |       |    | CRISPR-associated protein, CT1974 family                                                         |
| Dde_0910 | -0,39 | -1,92 | 0,52  | 3,82  | 0,92 | -0,49 |       |    | hypothetical protein                                                                             |
| Dde_0933 | -0,31 | -2,01 | 0,31  | 2,61  | 0,62 | -0,42 |       |    | hypothetical protein                                                                             |
| Dde_0939 | -0,32 | -2,53 | 0,25  | 2,81  | 0,57 | -0,65 |       |    | Uncharacterized protein conserved in bacteria                                                    |
| Dde_0940 | -0,50 | -2,66 | 0,23  | 3,36  | 0,73 | -0,54 |       |    | hypothetical protein                                                                             |
| Dde_0941 | -0,23 | -2,21 | 0,29  | 2,29  | 0,52 | -0,13 |       |    | hypothetical protein                                                                             |
| Dde_0944 | -0,64 | -1,84 | 0,30  | 1,98  | 0,94 | -0,06 |       |    | hypothetical protein                                                                             |
| Dde_0947 | -0,31 | -2,34 | 0,55  | 3,47  | 0,86 | -0,23 |       |    | hypothetical protein                                                                             |
| Dde_0948 | -0,51 | -3,65 | 0,40  | 4,13  | 0,91 | -0,47 |       |    | Phage tail protein                                                                               |
| Dde_0949 | -0,55 | -3,90 | 0,35  | 4,42  | 0,90 | -0,13 |       |    | hypothetical protein                                                                             |
| Dde_0950 | -0,56 | -3,19 | 0,46  | 3,80  | 1,02 | -0,09 |       |    | hypothetical protein                                                                             |
| Dde_0954 | -0,31 | -1,56 | 0,51  | 3,15  | 0,82 | 0,41  |       |    | hypothetical protein                                                                             |
| Dde_0955 | -0,18 | -1,41 | 0,34  | 2,70  | 0,52 | -0,41 |       |    | hypothetical protein                                                                             |
| Dde_0957 | -0,37 | -2,45 | 0,19  | 3,13  | 0,57 | -0,57 |       |    | hypothetical protein                                                                             |
| Dde_0958 | -0,54 | -2,83 | 0,26  | 3,01  | 0,80 | -0,79 |       |    | Glucosamine 6-phosphate synthetase, contains amidotransferase and phosphosugar isomerase domains |
| Dde_1033 | 0,84  | 2,07  | -0,22 | -3,11 | 1,06 | 0,76  |       | S  | Conserved hypothetical protein TIGR00242                                                         |
| Dde_1060 | -0,51 | -2,84 | 0,18  | 2,78  | 0,69 | -0,51 | pstA  | P  | High-affinity phosphate-specific transport system                                                |
| Dde_1061 | -0,59 | -2,86 | 0,21  | 3,53  | 0,80 | -0,41 | pstC  | P  | High-affinity phosphate-specific transport system, cytoplasmic membrane component                |
| Dde_1111 | 0,94  | 2,96  | -0,31 | -3,15 | 1,25 | 2,38  | QmoA  | C  | Quinone-interacting membrane-bound oxidoreductase (Shelley Haveman)                              |
| Dde_1112 | 0,28  | 3,06  | -0,50 | -4,29 | 0,78 | 1,93  | QmoB  | C  | Quinone-interacting membrane-bound oxidoreductase (Shelley Haveman)                              |
| Dde_1161 | -0,71 | -3,17 | 0,28  | 2,64  | 0,99 | -0,45 |       |    | hypothetical protein                                                                             |
| Dde_1216 | -0,42 | -2,36 | 0,25  | 1,41  | 0,67 | -0,23 |       | P  | alkaline phosphatase                                                                             |
| Dde_1218 | 0,92  | 2,13  | -0,26 | -3,04 | 1,18 | -0,12 |       | E  | Glutamate synthase-related protein                                                               |



|          |       |       |       |       |      |       |        |    |                                                                                                  |
|----------|-------|-------|-------|-------|------|-------|--------|----|--------------------------------------------------------------------------------------------------|
| Dde_1222 | 2,10  | 4,35  | -0,45 | -3,10 | 2,55 | 0,68  |        | C  | rubrerythrin                                                                                     |
| Dde_1251 | -0,34 | -1,47 | 0,40  | 3,21  | 0,74 | -0,04 |        | HC | Oxidoreductase, FAD-binding, putative                                                            |
| Dde_1256 | -0,51 | -3,20 | 0,07  | 2,53  | 0,58 | -0,40 | frdB   | C  | fumarate reductase, iron sulfur protein (Jessica Butler)                                         |
| Dde_1257 | -0,57 | -2,95 | 0,21  | 2,23  | 0,78 | -0,17 | frdA   | C  | Fumarate reductase, anaerobic, flavoprotein subunit                                              |
| Dde_1343 | 0,81  | -2,90 | -0,50 | -5,61 | 1,31 | -0,03 | hspC   | O  | Small heat shock protein (class I) (hspC)                                                        |
| Dde_1344 | 0,19  | -2,93 | -0,38 | -5,22 | 0,57 | 0,32  |        | O  | Putative small heat shock protein hsp15                                                          |
| Dde_1371 | 0,58  | 3,02  | -0,19 | -2,45 | 0,77 | 1,26  |        | M  | outer membrane protein OmpH, putative                                                            |
| Dde_1372 | 0,34  | 3,49  | -0,25 | -3,45 | 0,59 | 0,35  | lpxD   | M  | UDP-3-O-[3-hydroxymyristoyl] glucosamine N-acyltransferase                                       |
| Dde_1384 | 0,52  | 2,57  | -0,25 | -3,02 | 0,77 | 2,26  |        |    | Conserved hypothetical protein                                                                   |
| Dde_1497 | 0,82  | 2,04  | -0,30 | -4,50 | 1,12 | 0,03  |        | S  | Uncharacterized conserved protein                                                                |
| Dde_1540 | 0,82  | 2,63  | -0,27 | -4,42 | 1,09 | 0,84  |        |    | Conserved hypothetical protein                                                                   |
| Dde_1602 | -0,28 | -2,26 | 0,26  | 3,66  | 0,53 | -0,38 |        | V  | ABC-type multidrug transport system, ATPase and permease components                              |
| Dde_1603 | -0,43 | -2,31 | 0,48  | 4,30  | 0,91 | -0,61 |        |    | ATP-utilizing enzymes of the PP-loop superfamily                                                 |
| Dde_1604 | -0,70 | -2,88 | 0,45  | 4,01  | 1,15 | -0,57 |        | H  | Phosphopantetheinyl transferase                                                                  |
| Dde_1605 | -0,37 | -2,55 | 0,29  | 2,95  | 0,67 | -0,17 |        | Q  | Predicted thioesterase involved in non-ribosomal peptide biosynthesis                            |
| Dde_1731 | -0,55 | -2,11 | 0,27  | 1,99  | 0,83 | -0,60 |        |    | Uncharacterized phage-encoded protein                                                            |
| Dde_1758 | 0,78  | 2,34  | -0,21 | -3,02 | 0,98 | -0,23 |        |    | hypothetical protein                                                                             |
| Dde_1765 | 0,60  | 3,76  | -0,27 | -3,78 | 0,87 | 0,60  | pyrG   | F  | CTP synthase                                                                                     |
| Dde_1766 | 0,33  | 2,92  | -0,28 | -3,78 | 0,61 | -0,28 | kdsA   | M  | 2-dehydro-3-deoxyphosphooctonate aldolase                                                        |
| Dde_1769 | 0,32  | 3,24  | -0,23 | -3,10 | 0,55 | 0,50  |        | S  | Conserved hypothetical protein                                                                   |
| Dde_1774 | 0,39  | 2,24  | -0,28 | -4,13 | 0,67 | 0,37  |        | R  | Orf, hypothetical protein                                                                        |
| Dde_1787 | 0,93  | 4,20  | -0,22 | -2,23 | 1,15 | 0,85  |        | M  | putative lipoprotein                                                                             |
| Dde_1791 | 0,38  | 1,82  | -0,42 | -2,91 | 0,80 | 0,78  |        | P  | Ferroxidase                                                                                      |
| Dde_1793 | 0,31  | 2,81  | -0,40 | -4,20 | 0,71 | 0,70  | porB   | C  | Pyruvate ferredoxin oxidoreductase, beta subunit, putative                                       |
| Dde_1794 | 1,00  | 3,73  | -0,30 | -3,19 | 1,30 | 1,73  |        |    | hypothetical protein                                                                             |
| Dde_1814 | 1,03  | 4,50  | -0,30 | -2,86 | 1,33 | 0,09  | gltB-1 | E  | Glutamate synthase, large subunit (gltB-1)                                                       |
| Dde_1821 | 0,56  | 1,90  | -0,22 | -2,67 | 0,79 | 2,81  |        | C  | Cytochrome c-553 precursor                                                                       |
| Dde_1842 | 0,57  | 2,67  | -0,23 | -2,31 | 0,80 | 0,53  |        | C  | protein of unknown function DUF224 cysteine-rich region domain protein                           |
| Dde_1844 | 0,44  | 2,65  | -0,30 | -2,86 | 0,74 | -0,06 |        | S  | Uncharacterized ACR, YkgG family COG1556 family                                                  |
| Dde_1863 | -0,44 | -2,15 | 0,37  | 3,85  | 0,80 | -0,06 |        | S  | VrlH                                                                                             |
| Dde_1864 | -0,38 | -3,08 | 0,40  | 4,65  | 0,78 | -0,27 |        | M  | Glucosamine 6-phosphate synthetase, contains amidotransferase and phosphosugar isomerase domains |
| Dde_1870 | -0,59 | -3,61 | 0,21  | 2,81  | 0,81 | 0,09  |        |    | hypothetical protein                                                                             |
| Dde_1871 | -0,74 | -4,68 | 0,34  | 4,40  | 1,08 | 0,00  |        |    | hypothetical protein                                                                             |
| Dde_1872 | -0,38 | -4,29 | 0,37  | 5,25  | 0,75 | -0,46 |        |    | hypothetical protein                                                                             |
| Dde_1873 | -0,29 | -3,52 | 0,33  | 4,17  | 0,61 | -0,40 |        |    | Phage tail protein                                                                               |
| Dde_1874 | -0,50 | -2,40 | 0,15  | 2,73  | 0,65 | -0,47 |        |    | hypothetical protein                                                                             |
| Dde_1895 | 0,34  | 3,34  | -0,37 | -3,49 | 0,71 | 1,60  |        |    | hypothetical protein                                                                             |
| Dde_1903 | -0,24 | -1,96 | 0,40  | 3,17  | 0,64 | -0,54 |        |    | hypothetical protein                                                                             |
| Dde_1904 | -0,31 | -2,03 | 0,35  | 3,50  | 0,66 | -0,41 |        | L  | Adenine-specific DNA methylase                                                                   |
| Dde_1909 | -0,77 | -2,18 | 0,44  | 2,99  | 1,21 | 0,61  |        |    | hypothetical protein                                                                             |
| Dde_1910 | -0,28 | -1,74 | 0,34  | 3,02  | 0,62 | -0,02 |        |    | hypothetical protein                                                                             |
| Dde_1926 | -0,37 | -2,19 | 0,19  | 2,66  | 0,56 | -0,51 |        |    | hypothetical protein                                                                             |
| Dde_1927 | -0,39 | -2,29 | 0,25  | 3,02  | 0,64 | -0,16 |        |    | hypothetical protein                                                                             |
| Dde_1968 | 0,73  | 3,13  | -0,09 | -1,62 | 0,83 | 0,39  |        |    | Conserved hypothetical protein                                                                   |
| Dde_1969 | 0,68  | 2,62  | -0,13 | -2,32 | 0,81 | -0,04 | folK   | H  | 2-amino-4-hydroxy-6-hydroxymethylidihydropteridine pyrophosphokinase                             |
| Dde_2005 | 0,62  | 2,39  | -0,21 | -2,00 | 0,84 | 0,06  |        |    | hypothetical protein                                                                             |
| Dde_2008 | 0,95  | 2,62  | -0,25 | -3,11 | 1,20 | 0,43  | hspC   | O  | Heat shock protein 16.5 (hspC)                                                                   |
| Dde_2077 | 0,47  | 2,41  | -0,12 | -2,03 | 0,59 | 0,39  | pcm    | O  | protein-L-isoaspartate O-methyltransferase                                                       |
| Dde_2078 | 0,46  | 2,39  | -0,20 | -3,38 | 0,66 | 1,98  |        | R  | Acetoin utilization protein AcuB, putative                                                       |
| Dde_2130 | 0,19  | 3,07  | -0,41 | -3,74 | 0,61 | 0,42  | rho    | K  | transcription termination factor Rho                                                             |
| Dde_2145 | 0,61  | 3,25  | -0,10 | -2,38 | 0,71 | 0,61  |        |    | Periplasmic protein, putative                                                                    |
| Dde_2148 | 0,91  | 4,29  | -0,12 | -2,46 | 1,03 | 1,26  | CheZ   | NT | CheY Protein Phosphatase (Christopher Rao)                                                       |
| Dde_2222 | 0,50  | 2,56  | -0,35 | -3,21 | 0,85 | 0,52  | tig    | O  | trigger factor                                                                                   |
| Dde_2273 | 0,26  | 2,96  | -0,35 | -3,29 | 0,61 | 2,17  | DsrJ   |    | Periplasmic (Sec) triheme cytochrome c (Shelley Haveman)                                         |
| Dde_2274 | 0,05  | 2,18  | -0,63 | -4,51 | 0,68 | 1,62  | DsrO   | C  | Periplasmic (Tat), binds 2[4Fe-4S] (Shelley Haveman)                                             |
| Dde_2300 | 0,29  | 2,27  | -0,26 | -4,41 | 0,55 | 0,70  |        | Q  | Orf, hypothetical protein                                                                        |
| Dde_2354 | -0,60 | -3,05 | 0,25  | 2,38  | 0,85 | -0,60 |        | L  | nuclease (SNase-like)                                                                            |
| Dde_2358 | -0,56 | -2,67 | 0,26  | 3,72  | 0,82 | -0,70 |        | OU | Type III leader peptidase family domain protein                                                  |
| Dde_2359 | -0,37 | -3,34 | 0,42  | 5,03  | 0,79 | -0,23 |        | U  | Conserved hypothetical protein                                                                   |
| Dde_2360 | -0,58 | -3,24 | 0,42  | 4,88  | 1,01 | -0,35 | cpaC   | U  | Pilus assembly protein CpaC (cpaC)                                                               |
| Dde_2361 | -0,65 | -3,22 | 0,31  | 3,92  | 0,96 | -0,18 |        |    | hypothetical protein                                                                             |
| Dde_2362 | -0,32 | -3,02 | 0,35  | 5,19  | 0,67 | -0,52 |        | U  | Pilus assembly protein CpaE, putative                                                            |
| Dde_2363 | -0,45 | -3,20 | 0,37  | 5,61  | 0,81 | -0,42 |        | U  | type II/IV secretion system protein                                                              |
| Dde_2364 | -0,57 | -3,46 | 0,36  | 5,25  | 0,93 | -0,56 |        | U  | Conserved hypothetical protein                                                                   |
| Dde_2365 | -0,46 | -3,29 | 0,35  | 4,78  | 0,81 | -0,45 |        | NU | Conserved hypothetical protein                                                                   |
| Dde_2366 | -0,40 | -3,07 | 0,29  | 4,57  | 0,69 | -0,28 |        | NU | Flp pilus assembly protein TaddD, contains TPR repeats                                           |
| Dde_2367 | -0,34 | -2,41 | 0,25  | 4,53  | 0,59 | -0,09 |        |    | Conserved hypothetical protein                                                                   |
| Dde_2462 | 0,59  | 1,69  | -0,34 | -3,41 | 0,93 | -0,04 |        |    | Conserved hypothetical protein                                                                   |
| Dde_2464 | 0,39  | 2,64  | -0,24 | -2,59 | 0,63 | 0,25  |        |    | Conserved hypothetical protein                                                                   |

|          |       |       |       |       |      |       |        |     |                                                                   |
|----------|-------|-------|-------|-------|------|-------|--------|-----|-------------------------------------------------------------------|
| Dde_2519 | 0,48  | 3,29  | -0,29 | -3,22 | 0,77 | 0,72  |        | T   | Prokaryotic dksA/traR C4-type zinc finger, putative               |
| Dde_2561 | 0,08  | 1,92  | -0,74 | -5,03 | 0,83 | 1,06  |        | S   | Rhodanese-like domain protein                                     |
| Dde_2562 | 0,02  | 1,58  | -0,69 | -4,65 | 0,72 | 0,49  |        | C   | Pyridine nucleotide-disulphide oxidoreductase family              |
| Dde_2633 | 0,77  | 2,03  | -0,17 | -2,48 | 0,94 | -0,08 |        | K   | Conserved hypothetical protein                                    |
| Dde_2639 | 0,32  | 2,01  | -0,28 | -3,50 | 0,60 | 1,30  | thrS   | J   | Threonyl-tRNA synthetase                                          |
| Dde_2658 | -0,89 | -3,36 | 0,32  | 4,11  | 1,22 | 0,04  |        | IQR | 3-oxoacyl-(acyl-carrier protein) reductase                        |
| Dde_2793 | 0,92  | 4,32  | -0,20 | -3,29 | 1,12 | 1,15  | arsC-2 | T   | Arsenate reductase                                                |
| Dde_2819 | 0,23  | -2,32 | -1,49 | -5,42 | 1,72 | 0,20  |        |     | hypothetical protein                                              |
| Dde_2901 | 0,58  | 3,39  | -0,27 | -3,41 | 0,85 | 1,12  | gmd    | M   | GDP-mannose 4,6-dehydratase                                       |
| Dde_2904 | 0,54  | 1,91  | -0,27 | -2,80 | 0,81 | 2,76  |        |     | CopG family transcriptional regulator                             |
| Dde_3401 | 0,85  | 4,24  | -0,35 | -3,09 | 1,21 | 1,46  |        |     | hypothetical protein                                              |
| Dde_3518 | -0,77 | -2,98 | 0,19  | 3,36  | 0,96 | -0,52 | modA   | P   | molybdenum ABC transporter, periplasmic molybdate-binding protein |
| Dde_3528 | -0,85 | -3,94 | 0,24  | 3,87  | 1,09 | -0,29 |        |     | Heterodisulfide reductase subunit                                 |

**Supplemental Table S8:** Differentially up-/downregulated genes of *Desulfovibrio alaskensis* str. G20 in syntrophic coculture with different methanogenic partners (*Methanococcus maripaludis* or *Methanospirillum hungatei*, respectively) (list is organized by G20 gene ID number)

| G20 Gene ID                                          | log <sub>2</sub> R<br>0.027<br>h <sup>-1</sup><br>MM | Z-<br>score | log <sub>2</sub> R<br>0.027<br>h <sup>-1</sup><br>MH | Z-<br>score | Abs.<br>differ<br>ence<br>log <sub>2</sub> R | Abs.<br>log <sub>2</sub><br>0.027<br>h <sup>-1</sup><br>MH | Gene<br>name | CO<br>G | Annotation                                                                                |
|------------------------------------------------------|------------------------------------------------------|-------------|------------------------------------------------------|-------------|----------------------------------------------|------------------------------------------------------------|--------------|---------|-------------------------------------------------------------------------------------------|
| <b>Upregulated under both conditions</b>             |                                                      |             |                                                      |             |                                              |                                                            |              |         |                                                                                           |
| Dde_0089                                             | 1,17                                                 | 5,61        | 0,03                                                 | 1,79        | 1,14                                         | -0,48                                                      |              | I       | Putative enzyme                                                                           |
| Dde_0090                                             | 1,34                                                 | 5,61        | 0,23                                                 | 1,85        | 1,11                                         | -0,41                                                      |              | E       | 2-hydroxyglutaryl-CoA dehydratase family (Natalia Ivanova)                                |
| Dde_0227                                             | 0,75                                                 | 3,19        | 1,49                                                 | 4,98        | 0,73                                         | 4,47                                                       | cstA         | T       | Carbon starvation protein                                                                 |
| Dde_0286                                             | 1,31                                                 | 5,61        | 0,45                                                 | 5,00        | 0,87                                         | 3,50                                                       | fd II        | C       | Ferredoxin II (Sean Caffrey)                                                              |
| Dde_0608                                             | 0,16                                                 | 2,12        | 1,00                                                 | 2,54        | 0,84                                         | 1,82                                                       | livF         | E       | ATP-binding component of leucine transport                                                |
| Dde_0715                                             | 2,85                                                 | 5,61        | 3,60                                                 | 5,61        | 0,74                                         | 5,44                                                       |              | C       | hypothetical protein                                                                      |
| Dde_0717                                             | 1,40                                                 | 5,61        | 2,90                                                 | 5,61        | 1,50                                         | 4,41                                                       |              | C       | formate dehydrogenase, alpha subunit                                                      |
| Dde_0718                                             | 1,10                                                 | 5,61        | 2,20                                                 | 5,61        | 1,10                                         | 3,43                                                       |              | C       | Anaerobic dimethyl sulfoxide reductase chain b (hyaA)                                     |
| Dde_0719                                             | 1,17                                                 | 5,55        | 1,91                                                 | 5,61        | 0,75                                         | 3,64                                                       |              | H       | Fe-S cluster domain protein                                                               |
| Dde_0805                                             | 1,07                                                 | 5,61        | 0,23                                                 | 2,10        | 0,84                                         | 0,28                                                       |              | P       | DoxX family protein                                                                       |
| Dde_0806                                             | 1,14                                                 | 5,61        | 0,13                                                 | 2,07        | 1,01                                         | -0,44                                                      |              | P       | Rhodanese-like domain protein                                                             |
| Dde_1866                                             | 1,00                                                 | 3,19        | 0,41                                                 | 2,91        | 0,59                                         | 0,01                                                       |              |         | hypothetical protein                                                                      |
| Dde_2177                                             | 0,90                                                 | 3,55        | 0,22                                                 | 3,12        | 0,68                                         | 3,35                                                       | tatA         | U       | twin-arginine translocation protein TatA                                                  |
| Dde_3444                                             | 0,31                                                 | 2,83        | 0,94                                                 | 4,62        | 0,63                                         | 1,63                                                       |              |         | hypothetical protein                                                                      |
| <b>Downregulated under both conditions</b>           |                                                      |             |                                                      |             |                                              |                                                            |              |         |                                                                                           |
| Dde_2134                                             | -1,33                                                | -5,61       | -0,15                                                | -4,05       | 1,18                                         | 2,66                                                       | hysA         | C       | hydrogenase (NiFe) small subunit HydA                                                     |
| Dde_2135                                             | -1,37                                                | -5,61       | -0,31                                                | -4,60       | 1,06                                         | 2,12                                                       |              | C       | periplasmic [NiFeSe] hydrogenase, large subunit, selenocysteine-containing (Sean Caffrey) |
| <b>Differently regulated between both conditions</b> |                                                      |             |                                                      |             |                                              |                                                            |              |         |                                                                                           |
| Dde_2136                                             | -0,13                                                | -1,74       | 0,57                                                 | 1,33        | 0,70                                         | 1,51                                                       | hynB-1       | C       | Hydrogenase expression/formation protein                                                  |
| Dde_2137                                             | 1,11                                                 | 5,61        | -0,10                                                | -1,32       | 1,21                                         | 0,93                                                       |              | C       | periplasmic [NiFe] hydrogenase, small subunit, isozyme 1 (Sean Caffrey)                   |
| Dde_2138                                             | 0,94                                                 | 4,23        | 0,03                                                 | 0,11        | 0,91                                         | 0,78                                                       | hynA-1       | C       | Probable large subunit, hydrogenase-2                                                     |
| Dde_2246                                             | -0,24                                                | -4,34       | 0,24                                                 | 2,44        | 0,48                                         | 3,00                                                       | rplX         | J       | Ribosomal protein L24                                                                     |
| Dde_2247                                             | -0,38                                                | -4,07       | 0,15                                                 | 2,62        | 0,53                                         | 2,84                                                       | rplN         | J       | Ribosomal protein L14                                                                     |
| Dde_2555                                             | 0,49                                                 | 2,79        | -0,39                                                | -5,35       | 0,88                                         | 0,57                                                       |              |         | hypothetical protein                                                                      |

**Supplemental Table S9A:** Commonly up-/downregulated genes of *Desulfovibrio alaskensis* str. G20 in syntrophic cocultures irrespective of methanogenic partner and growth rate (genes included have an abs. Z-score  $\geq 2.0$ ; list is organized by G20 gene ID number)

| G20 Gene ID                   | log <sub>2</sub> R<br>0.047<br>h <sup>-1</sup><br>MM | log <sub>2</sub> R<br>0.027<br>h <sup>-1</sup><br>MM | log <sub>2</sub> R<br>0.027<br>h <sup>-1</sup><br>MH | Gene<br>name | COG | Annotation                                                                     |
|-------------------------------|------------------------------------------------------|------------------------------------------------------|------------------------------------------------------|--------------|-----|--------------------------------------------------------------------------------|
| <b>Commonly upregulated</b>   |                                                      |                                                      |                                                      |              |     |                                                                                |
| Dde_0227                      | 0,76                                                 | 0,75                                                 | 1,48                                                 | cstA         | T   | Carbon starvation protein                                                      |
| Dde_0715                      | 2,89                                                 | 2,85                                                 | 3,60                                                 |              | C   | hypothetical protein                                                           |
| Dde_0717                      | 1,46                                                 | 1,40                                                 | 2,90                                                 | fdhA         | C   | formate dehydrogenase, alpha subunit                                           |
| Dde_0718                      | 1,85                                                 | 1,10                                                 | 2,20                                                 | fdhB         | C   | Anaerobic dimethyl sulfoxide reductase chain b (hybA)                          |
| Dde_0719                      | 1,57                                                 | 1,17                                                 | 1,91                                                 | fdh          | H   | Fe-S cluster domain protein                                                    |
| Dde_1074                      | 1,32                                                 | 1,30                                                 | 1,50                                                 | lctP1        | C   | Putative permease                                                              |
| Dde_2982                      | 1,83                                                 | 0,78                                                 | 1,19                                                 | rpmE         | J   | Ribosomal protein L31                                                          |
| Dde_3159                      | 0,64                                                 | 0,61                                                 | 0,77                                                 | flgF         | N   | Flagellar basal-body rod protein FlgF                                          |
| Dde_3211                      | 1,15                                                 | 1,50                                                 | 1,88                                                 | ssc          | C   | split soret cytochrome c precursor                                             |
| Dde_3238                      | 0,78                                                 | 0,62                                                 | 0,68                                                 | lctP2        | C   | L-lactate permease, putative                                                   |
| Dde_3239                      | 0,55                                                 | 0,75                                                 | 1,01                                                 | ldhA         | C   | Glycolate oxidase subunit D                                                    |
| Dde_3240                      | 0,50                                                 | 0,63                                                 | 0,91                                                 | ldhB1        | C   | Glycolate oxidase iron-sulfur subunit                                          |
| Dde_3244                      | 0,83                                                 | 0,51                                                 | 0,73                                                 |              | C   | Uncharacterized ACR, YkgG family COG1556 family                                |
| Dde_3245                      | 0,51                                                 | 0,62                                                 | 0,96                                                 | ldhB2        | C   | Iron-sulfur cluster binding protein                                            |
| <b>Commonly downregulated</b> |                                                      |                                                      |                                                      |              |     |                                                                                |
| Dde_0111                      | -0,92                                                | -2,24                                                | -2,30                                                |              |     | Zinc resistance-associated protein precursor                                   |
| Dde_0283                      | -2,82                                                | -2,98                                                | -2,76                                                |              |     | Conserved hypothetical protein                                                 |
| Dde_0444                      | -2,37                                                | -1,53                                                | -1,73                                                | pqqL         | RU  | Putative peptidase                                                             |
| Dde_0445                      | -2,36                                                | -1,40                                                | -1,53                                                |              | U   | ABC transporter, ATP-binding protein, putative                                 |
| Dde_0446                      | -1,59                                                | -0,67                                                | -0,76                                                |              | U   | hypothetical protein                                                           |
| Dde_0447                      | -1,79                                                | -0,65                                                | -0,80                                                |              | U   | Orf, hypothetical protein                                                      |
| Dde_0449                      | -1,35                                                | -0,69                                                | -0,73                                                |              | U   | Putative transport system permease protein                                     |
| Dde_0452                      | -1,17                                                | -0,64                                                | -0,64                                                |              |     | hypothetical protein                                                           |
| Dde_0453                      | -1,35                                                | -0,65                                                | -0,81                                                |              | U   | biopolymer transport proteins-like                                             |
| Dde_0454                      | -1,26                                                | -0,54                                                | -0,73                                                |              | U   | biopolymer transport proteins-like                                             |
| Dde_0455                      | -0,90                                                | -0,51                                                | -0,67                                                |              | U   | Biopolymer transport protein                                                   |
| Dde_0456                      | -1,07                                                | -0,68                                                | -0,76                                                |              | M   | TonB-like                                                                      |
| Dde_0457                      | -1,25                                                | -0,58                                                | -0,67                                                |              | U   | Putative Zn-dependent protease, contains TPR repeats                           |
| Dde_0483                      | -1,17                                                | -0,80                                                | -0,89                                                |              |     | MoxR-like ATPases                                                              |
| Dde_0484                      | -1,18                                                | -0,89                                                | -1,02                                                |              |     | Conserved hypothetical protein                                                 |
| Dde_0485                      | -0,68                                                | -0,51                                                | -0,55                                                |              |     | hypothetical protein                                                           |
| Dde_0607                      | -0,56                                                | -0,82                                                | -0,81                                                |              |     | hypothetical protein                                                           |
| Dde_1143                      | -0,50                                                | -1,01                                                | -0,56                                                |              |     | Conserved hypothetical protein                                                 |
| Dde_1151                      | -1,10                                                | -0,60                                                | -0,69                                                | hdd          | T   | Response regulator containing a CheY-like receiver domain and an HD-GYP domain |
| Dde_1312                      | -2,48                                                | -1,76                                                | -1,76                                                |              | P   | Copper chaperone                                                               |
| Dde_1611                      | -1,44                                                | -1,21                                                | -1,21                                                | araC         | K   | AraC family transcriptional regulator                                          |
| Dde_2152                      | -2,76                                                | -2,82                                                | -2,93                                                |              |     | hypothetical protein                                                           |
| Dde_2153                      | -2,87                                                | -2,64                                                | -2,74                                                |              | U   | Biopolymer transport proteins                                                  |
| Dde_2154                      | -3,10                                                | -2,78                                                | -3,06                                                |              | U   | Biopolymer transport proteins                                                  |
| Dde_2155                      | -2,43                                                | -1,90                                                | -2,08                                                |              | U   | Biopolymer transport proteins                                                  |
| Dde_2156                      | -1,85                                                | -1,60                                                | -1,76                                                |              | M   | TonB-like                                                                      |
| Dde_2157                      | -1,72                                                | -1,38                                                | -1,43                                                |              |     | TPR repeat-containing protein                                                  |
| Dde_2560                      | -0,92                                                | -0,90                                                | -0,90                                                |              | O   | Thioredoxin peroxidase                                                         |
| Dde_2641                      | -0,61                                                | -0,76                                                | -0,93                                                | b0873        | C   | hybrid cluster protein                                                         |
| Dde_2669                      | -3,53                                                | -2,06                                                | -2,17                                                | feoB         | P   | ferrous iron transport protein B                                               |
| Dde_2670                      | -3,13                                                | -2,50                                                | -2,45                                                | feoA         | P   | ferrous iron transporter component feoA                                        |
| Dde_2672                      | -2,67                                                | -2,44                                                | -2,25                                                | feoB         | P   | hypothetical protein                                                           |
| Dde_2673                      | -3,13                                                | -1,98                                                | -1,80                                                | feoA         | P   | ferrous iron transporter component feoA                                        |
| Dde_3045                      | -0,97                                                | -0,71                                                | -0,82                                                |              |     | Conserved hypothetical protein                                                 |
| Dde_3046                      | -2,05                                                | -0,99                                                | -1,07                                                |              |     | Conserved hypothetical protein                                                 |
| Dde_3047                      | -0,90                                                | -0,61                                                | -0,80                                                |              | TK  | Serine phosphatase RsbU, regulator of sigma subunit                            |
| Dde_3144                      | -1,22                                                | -1,27                                                | -1,16                                                |              |     | hypothetical protein                                                           |
| Dde_3197                      | -2,38                                                | -2,18                                                | -1,94                                                |              |     | hypothetical protein                                                           |
| Dde_3198                      | -2,50                                                | -1,94                                                | -1,88                                                |              |     | Uncharacterized ACR, COG1433 family                                            |
| Dde_3199                      | -2,65                                                | -2,29                                                | -2,10                                                |              |     | hypothetical protein                                                           |
| Dde_3200                      | -1,55                                                | -1,67                                                | -1,67                                                |              | C   | Iron-sulfur cluster binding protein                                            |
| Dde_3201                      | -1,49                                                | -1,12                                                | -1,05                                                |              | C   | Iron-sulfur cluster binding protein                                            |
| Dde_3202                      | -2,55                                                | -1,71                                                | -1,74                                                | mrp          | D   | Mrp protein                                                                    |
| Dde_3666                      | -1,59                                                | -0,86                                                | -1,00                                                |              |     | hypothetical protein                                                           |
| Dde_3667                      | -4,43                                                | -2,68                                                | -2,83                                                | fld          | C   | Flavodoxin, iron-repressed                                                     |
| Dde_3707                      | -1,07                                                | -1,49                                                | -1,60                                                | tmcD         | C   | hypothetical protein                                                           |
| Dde_3708                      | -1,29                                                | -1,00                                                | -1,18                                                | tmcC         | C   | Transmembrane complex, integral membrane protein                               |
| Dde_3709                      | -1,11                                                | -1,51                                                | -1,62                                                | tmcB         | C   | Transmembrane complex, ferredoxin, 2 [4Fe-4S]                                  |
| Dde_3710                      | -0,80                                                | -1,02                                                | -1,13                                                | tmcA         | C   | Transmembrane complex, tetraheme cytochrome c <sub>3</sub>                     |
| Dde_3711                      | -1,43                                                | -1,55                                                | -1,64                                                |              |     | Conserved hypothetical protein                                                 |

|          |       |       |       |      |   |                                                          |
|----------|-------|-------|-------|------|---|----------------------------------------------------------|
| Dde_3712 | -1,39 | -1,53 | -1,81 |      | T | Universal stress protein family family                   |
| Dde_3713 | -1,29 | -1,60 | -1,81 | mtrA | T | DNA-binding response regulator                           |
| Dde_3714 | -1,04 | -1,16 | -1,23 | divK | T | Nitrogen regulation protein NtrX                         |
| Dde_3737 | -0,49 | -0,70 | -0,73 |      | T | Phosphoenolpyruvate-protein phosphotransferase, putative |

**Supplemental Table S9B:** Commonly up-/downregulated genes of *Desulfovibrio alaskensis* str. G20 in syntrophic cocultures with *Mccs. maripaludis* irrespective of growth rate (genes included have an abs. Z-score  $\geq 2.0$ ; list is organized by G20 gene ID number)

| G20 Gene ID                   | $\log_2 R$<br>0.047<br>h <sup>-1</sup><br>MM | $\log_2 R$<br>0.027<br>h <sup>-1</sup><br>MM | Gene name | COG | Annotation                                                                 |
|-------------------------------|----------------------------------------------|----------------------------------------------|-----------|-----|----------------------------------------------------------------------------|
| <b>Commonly upregulated</b>   |                                              |                                              |           |     |                                                                            |
| Dde_0089                      | 0,94                                         | 1,17                                         |           | E   | Putative enzyme                                                            |
| Dde_0090                      | 0,97                                         | 1,34                                         |           | E   | 2-hydroxyglutaryl-CoA dehydratase family                                   |
| Dde_0286                      | 2,57                                         | 1,31                                         | fd II     | C   | Ferredoxin II                                                              |
| Dde_0761                      | 0,96                                         | 0,56                                         |           |     | hypothetical protein                                                       |
| Dde_0805                      | 1,23                                         | 1,07                                         |           | P   | DoxX family protein                                                        |
| Dde_0806                      | 1,77                                         | 1,14                                         |           | P   | Rhodanese-like domain protein                                              |
| Dde_2018                      | 2,32                                         | 1,99                                         |           | S   | HesB-like domain, putative                                                 |
| Dde_2137                      | 0,92                                         | 1,11                                         | hynB      | C   | periplasmic [NiFe] hydrogenase, small subunit                              |
| Dde_2138                      | 1,26                                         | 0,94                                         | hynA      | C   | Probable large subunit, hydrogenase-2                                      |
| Dde_2280                      | 0,90                                         | 0,50                                         | hydB      | C   | Periplasmic Fe hydrogenase small subunit                                   |
| Dde_2281                      | 0,58                                         | 0,76                                         | hydA      | C   | Iron only hydrogenase large subunit                                        |
| Dde_2555                      | 0,93                                         | 0,49                                         |           |     | hypothetical protein                                                       |
| Dde_2897                      | 0,50                                         | 0,58                                         |           |     | Transposase and inactivated derivative                                     |
| Dde_3230                      | 0,81                                         | 0,51                                         |           |     | Domain of unknown function domain protein                                  |
| <b>Commonly downregulated</b> |                                              |                                              |           |     |                                                                            |
| Dde_2020                      | -1,72                                        | -1,57                                        |           | S   | conserved hypothetical protein                                             |
| Dde_2134                      | -1,11                                        | -1,33                                        | hysB      | C   | hydrogenase (NiFe) small subunit HysB                                      |
| Dde_2135                      | -1,17                                        | -1,37                                        | hysA      | C   | periplasmic [NiFeSe] hydrogenase, large subunit, selenocysteine-containing |
| Dde_2255                      | -0,65                                        | -0,60                                        | rplW      | J   | 50S ribosomal subunit protein L23                                          |
| Dde_2473                      | -0,96                                        | -0,51                                        | mopA      | O   | GroEL, chaperone Hsp60, peptide-dependent ATPase, heat shock protein       |

**Supplemental Table S9C:** Commonly up-/downregulated genes of *Desulfovibrio alaskensis* str. G20 in syntrophic cocultures at low growth rate (low energy availability) irrespective of methanogenic partner (genes included have an abs. Z-score  $\geq 2.0$ ; list is organized by G20 gene ID number)

| G20 Gene ID                   | $\log_2 R$<br>0.027<br>h <sup>-1</sup><br>MH | $\log_2 R$<br>0.027<br>h <sup>-1</sup><br>MH | Gene name | COG | Annotation                                           |
|-------------------------------|----------------------------------------------|----------------------------------------------|-----------|-----|------------------------------------------------------|
| <b>Commonly upregulated</b>   |                                              |                                              |           |     |                                                      |
| Dde_0645                      | 0,52                                         | 0,89                                         |           | C   | Cytochrome c <sub>3</sub> precursor                  |
| Dde_0954                      | 0,51                                         | 0,50                                         | por       | C   | POR                                                  |
| Dde_2796                      | 0,52                                         | 0,50                                         |           | J   | Translation elongation factor Tu                     |
| Dde_2989                      | 0,60                                         | 0,77                                         |           | R   | conserved hypothetical protein                       |
| Dde_3182                      | 1,22                                         | 1,19                                         |           | C   | Phosphate acetyltransferase, putative                |
| Dde_3237                      | 0,62                                         | 0,80                                         | ack       | C   | Acetate kinase                                       |
| Dde_3242                      | 0,56                                         | 0,93                                         |           |     | hypothetical protein                                 |
| Dde_3243                      | 0,57                                         | 0,88                                         |           |     | hypothetical protein                                 |
| Dde_3372                      | 0,57                                         | 0,50                                         |           |     | hypothetical protein                                 |
| <b>Commonly downregulated</b> |                                              |                                              |           |     |                                                      |
| Dde_0282                      | -1,01                                        | -1,03                                        |           |     | conserved hypothetical protein                       |
| Dde_1239                      | -0,69                                        | -0,66                                        |           |     | hypothetical protein                                 |
| Dde_2561                      | -0,74                                        | -0,71                                        |           | HS  | Rhodanese-like domain protein                        |
| Dde_2562                      | -0,69                                        | -0,75                                        |           | C   | Pyridine nucleotide-disulphide oxidoreductase family |
| Dde_2749                      | -0,65                                        | -0,57                                        |           | C   | Rubredoxin                                           |

|          |       |       |  |   |                                               |
|----------|-------|-------|--|---|-----------------------------------------------|
| Dde_2819 | -1,49 | -1,65 |  |   | hypothetical protein                          |
| Dde_3048 | -0,75 | -0,90 |  | T | FOG:GGDEF domain                              |
| Dde_3146 | -1,43 | -1,27 |  |   | hypothetical protein                          |
| Dde_3715 | -0,59 | -0,70 |  | T | Sensory transduction histidine kinase-related |
